# Supplementary material for: Two-Dimensional Cellular and Three-Dimensional Bio-Printed Skin Models to Screen Topical-Use Compounds for Irritation Potential
Source: Front Bioeng Biotechnol. 2020 Feb 21;8:109. doi: 10.3389/fbioe.2020.00109 (PMC7046801; doi:10.3389/fbioe.2020.00109)
Supplement: TABLE S1 — Cell viability of top 46 most toxic compounds in NKTC and NHEK cells measured by CellTiter-Glo and WST-8. [file Table_1.xlsx]

## Sheet: Sheet1
Supplemental Table 1. Cell viability of top 46 most toxic compounds in NKTC and NHEK cells measured by CellTiter-Glo and WST-8.
Sample Name	CAS No.	NKTC Cells		NHEK Cells
		WST-8 Assay, IC50 (Efficacy)	Celltiter-Glo, IC50 (Efficacy)	WST-8 Assay, IC50 (Efficacy)	Celltiter-Glo, IC50 (Efficacy)
1-Chloro-2,4-dinitrobenzene	97-00-7	9.18 ± 5.34 (-91.52 ± 11.24)	9.18 ± 5.34 (-97.83 ± 5.24)	4.76 ± 1.16 (-82.48 ± 2.48)	5.43 ± 0 (-84.46 ± 2.29)
C.I. Basic Violet 14	632-99-5	17.52 ± 4.01 (-47.49 ± 1.22)	19.4 ± 2.23 (-38.46 ± 5.96)	0.65 ± 0.49 (-45.27 ± 6.6)	1.16 ± 1.11 (-71.09 ± 5.32)
Methyl Violet	8004-87-3	0.91 ± 0.43 (-12.51 ± 10.84)	18.22 ± 4.11 (-36.67 ± 4.25)	0.51 ± 0.09 (-64.75 ± 5.35)	0.64 ± 0.12 (-86.89 ± 2.16)
Isodecyl acrylate	1330-61-6	8.68 ± 1.41 (-23.64 ± 3.02)	21.32 ± 5.18 (-23.19 ± 1.27)	1.54 ± 0.51 (-56.88 ± 3.41)	3.55 ± 1.14 (-96.64 ± 3.89)
Pentachlorophenol	87-86-5	1.18 ± 1.69 (-59.74 ± 3.42)	4.23 ± 4.29 (-71.77 ± 16.3)	0.12 ± 0.04 (-68.31 ± 4.68)	0.51 ± 0.14 (-71.37 ± 3.26)
D&C Red 27	13473-26-2	22.28 ± 1.51 (-72.52 ± 3.8)	28.05 ± 1.9 (-71.12 ± 2.72)	26.97 ± 23.36 (-23.83 ± 38.5)	44.85 ± 8.07 (-59.73 ± 12.44)
Diphenylcyclopropenone	886-38-4	5.47 ± 0.63 (-59.5 ± 7.44)	5.69 ± 0.73 (-79.48 ± 3.93)	36.58 ± 10.34 (-94.51 ± 15.88)	30.75 ± 3.53 (-90.37 ± 12.42)
Vitamin D3	67-97-0	0.66 ± 0.44 (11.02 ± 12.92)	4.08 ± 7.02 (12.32 ± 0.93)	12.68 ± 0.86 (-59.03 ± 6.07)	13.73 ± 1.58 (-64.59 ± 1.57)
Climbazole	38083-17-9		0.02 ± 0.01 (-7.6 ± 6.61)	0.54 ± 0 (-47.37 ± 42.07)	0.42 ± 0.11 (-71.38 ± 28.89)
Ketoconazole	65277-42-1	2.17 ± 1.88 (-5.28 ± 20.24)	2.55 ± 1.25 (-14.25 ± 8.51)	14.02 ± 9.17 (-73.35 ± 19.68)	26.41 ± 3.63 (-78.58 ± 3.34)
Hydroquinone	123-31-9	15.61 ± 3.57 (-27.85 ± 15.71)	0.37 ± 0.34 (-16.7 ± 14.62)	43.24 ± 0 (-106.87 ± 6.68)	28.39 ± 1.92 (-100.85 ± 4.01)
Chlorothalonil	545-06-2	6.07 ± 3.62 (-106.12 ± 6.3)	5.34 ± 2.01 (-105.46 ± 4.25)	1.2 ± 0.57 (-100.53 ± 2.1)	0.8 ± 0.5 (-96.01 ± 5.94)
Glutaraldehyde	111-30-8	88.01 ± 0 (-97.73 ± 14.91)	88.01 ± 0 (-89.85 ± 22.92)	24.44 ± 21.79 (-100.19 ± 12.28)	20.23 ± 7.92 (-96.9 ± 6.82)
Triclosan	3380-34-5	87.38 ± 5.69 (-115.68 ± 16.45)	90.67 ± 0 (-127.87 ± 8.24)	90.67 ± 0 (-126.89 ± 6.54)	55.13 ± 3.59 (-96.28 ± 3.92)
Bisphenol A diglycidyl ether	1675-54-3	65.2 ± 22.19 (-96.19 ± 20.93)	71.23 ± 13.31 (-100.41 ± 12.48)	43.66 ± 10.61 (-96.76 ± 13.65)	39.11 ± 10.9 (-93.84 ± 6.79)
Benzethonium chloride	121-54-0	27.58 ± 24.6 (-97.88 ± 11.47)	32.12 ± 21.97 (-109.54 ± 10.76)	3.43 ± 0.58 (-85.05 ± 1.36)	3.49 ± 0.97 (-82.35 ± 3.13)
Hexachlorophene	70-30-4	2.28 ± 0.89 (-102.5 ± 16.31)	18.78 ± 26.91 (-116.34 ± 15.82)	0.37 ± 0.02 (-92.29 ± 4.06)	0.39 ± 0.1 (-96.83 ± 7.72)
7,12-Dimethylbenz(a)anthracene	57-97-6	46.18 ± 3.13 (-90.26 ± 21.32)	46.18 ± 3.13 (-53.54 ± 23.81)	46.18 ± 3.13 (-95.74 ± 6.28)	46.18 ± 3.13 (-95.54 ± 3.27)
2,4-Dihydroxybenzophenone	131-56-6	54.08 ± 7.44 (-38.57 ± 10.53)	0.02 ± 0.02 (6.07 ± 5.5)	44.37 ± 0 (-65.23 ± 4.1)	58.13 ± 3.94 (-61.43 ± 7.55)
Benzyldimethyldodecylammonium chloride	139-07-1	22.25 ± 7.94 (-109.75 ± 20.96)	43.14 ± 7.35 (-61.18 ± 32.03)	3.36 ± 0.99 (-97.27 ± 8.17)	2.91 ± 0.99 (-96.93 ± 4.18)
Bronopol	52-51-7	53.84 ± 3.51 (-94.16 ± 4.99)	73.19 ± 4.95 (-122.64 ± 4.36)	24.95 ± 0 (-95.67 ± 2.22)	24.05 ± 1.57 (-91.91 ± 3.26)
Trimethylolpropane triacrylate	15625-89-5	24.95 ± 0 (-100.77 ± 4.64)	20.63 ± 1.4 (-113.95 ± 3.85)	24.95 ± 0 (-101.23 ± 1.59)	24.95 ± 0 (-94.19 ± 3.82)
Phenylmercuric acetate	62-38-4	0.38 ± 0.15 (-103.73 ± 10.57)	0.37 ± 0.16 (-98.56 ± 4.55)	0.01 ± 0 (-102.68 ± 5.37)	0.06 ± 0.02 (-104.98 ± 1.74)
Phenylacetaldehyde	122-78-1	33.08 ± 48.1 (-7.99 ± 61.21)	33.81 ± 47.78 (-4.7 ± 35.15)	88.54 ± 0 (-114.24 ± 8.33)	88.54 ± 0 (-109.35 ± 5.74)
2-Methyl-4-isothiazolin-3-one hydrochloride	26172-54-3	44.67 ± 7.24 (-33.53 ± 43.02)	60.06 ± 14.52 (-35.38 ± 49.56)	32.25 ± 12.63 (-70.8 ± 50.19)	39.87 ± 28.43 (-72.73 ± 40.39)
Rhodamine B	81-88-9	19.15 ± 31.8 (-24.41 ± 10.42)	10.94 ± 8.7 (-34.33 ± 8.62)		42.76 ± 2.79 (-58.94 ± 6.6)
S-Methoprene	65733-16-6	30.01 ± 50.69 (4.95 ± 36.24)	0.98 ± 0.39 (8.89 ± 9)	82.47 ± 10.51 (-84.59 ± 35.88)	82.47 ± 10.51 (-95.94 ± 4.07)
1-Dodecyl-2-pyrrolidinone	2687-96-9	29.71 ± 2.42 (-31.3 ± 27.71)	29.14 ± 1.97 (-52.75 ± 4.82)	15.81 ± 1.82 (-53.56 ± 7.12)	18.38 ± 1.24 (-69.5 ± 2.91)
Sodium lauryl polyoxyethylene ether sulfate	9004-82-4	72.2 ± 23.1 (-43.22 ± 37.52)	63.19 ± 43.9 (-25.88 ± 44.88)	39.68 ± 20.18 (-55.67 ± 15.85)	69.5 ± 32.98 (-56.17 ± 7.26)
Dodecanoic acid	143-07-7	88.54 ± 0 (-79.93 ± 6.24)	88.54 ± 0 (-67.53 ± 14.48)	58.13 ± 3.94 (-68.4 ± 13.15)	58.13 ± 3.94 (-59.53 ± 12.25)
Propylene glycol diacetate	623-84-7	13.88 ± 3.87 (-102.13 ± 16.71)	24.32 ± 13.22 (-112.78 ± 16.68)	8.53 ± 0.56 (-93.19 ± 6.41)	6.78 ± 0.44 (-97.05 ± 1.49)
Enzacamene	36861-47-9	88.54 ± 0 (-79.16 ± 68.57)	71.58 ± 16.37 (-86.58 ± 58.29)	88.54 ± 0 (-116.72 ± 6.17)	71.3 ± 14.93 (-96.84 ± 12.69)
Potassium dichromate	7778-50-9	2.3 ± 0.74 (-71.62 ± 7.64)	2.53 ± 0.53 (-87.05 ± 6.73)	1.97 ± 1.09 (-83.88 ± 6.58)	1.66 ± 0.62 (-83.8 ± 1.13)
p-Methylaminophenol sulfate	55-55-0	13.88 ± 3.87 (-102.13 ± 16.71)	24.32 ± 13.22 (-112.78 ± 16.68)	8.53 ± 0.56 (-93.19 ± 6.41)	6.78 ± 0.44 (-97.05 ± 1.49)
Dodecylbenzenesulfonic acid	27176-87-0	23.02 ± 10.81 (-107.15 ± 6.97)	29.89 ± 13.03 (-111.81 ± 5.68)	29.46 ± 29.13 (-98.06 ± 3.38)	25.8 ± 26.33 (-96.22 ± 3.96)
2-Hydroxyethyl acrylate	818-61-1	20.59 ± 30.92 (-5.3 ± 32.94)		17.44 ± 4.36 (-82.77 ± 4.08)	35.07 ± 9.77 (-95.5 ± 6.22)
1,3-Butanediol	107-88-0	26.57 ± 5.99 (-17.94 ± 4)		5.52 ± 1.38 (-57.06 ± 6.39)	13.45 ± 3.96 (-103.47 ± 2.84)
4'-Methoxyacetophenone	100-06-1		0.51 ± 0.68 (-10.34 ± 4.6)	53.37 ± 3.61 (-65.64 ± 15.78)	55.46 ± 3.61 (-75.27 ± 24.88)
Abietic acid	143-07-7	88.54 ± 0 (-79.93 ± 6.24)	88.54 ± 0 (-67.53 ± 14.48)	58.13 ± 3.94 (-68.4 ± 13.15)	58.13 ± 3.94 (-59.53 ± 12.25)
Propyl gallate	121-79-9	31.41 ± 0 (-40.51 ± 21.64)	47.98 ± 3.13 (-49.77 ± 3.2)	52.83 ± 4.3 (-20.05 ± 17.43)	50.42 ± 9.42 (-33.63 ± 6.41)
Ensulizole	27503-81-7	15.34 ± 0 (-0.91 ± 11.13)	23.54 ± 3.24 (-49.27 ± 9.67)		18.78 ± 3.2 (-43.18 ± 1.4)
Pyrethrins	8003-34-7	2.59 ± 3.05 (16.16 ± 5.16)	7.56 ± 3 (17.21 ± 18.47)	34.76 ± 15.99 (-57.96 ± 25.75)	24.08 ± 20.94 (-28.75 ± 42.47)
2-tert-Butylcyclohexyl acetate	88-41-5	5.19 ± 6.71 (-20.49 ± 23.21)	4.14 ± 4.09 (-5.15 ± 4.51)	8.1 ± 2.59 (-27.24 ± 23.62)	0.85 ± 0.21 (-31.94 ± 28.36)
tert-Butylhydroquinone	1948-33-0	34.66 ± 13.73 (-17.04 ± 20.74)	58.13 ± 3.94 (-61.68 ± 7.6)	88.54 ± 0 (-116.31 ± 2.36)	77.65 ± 18.86 (-100.16 ± 13.74)
Methylrosaniline chloride	548-62-9	42.76 ± 2.79 (-107.47 ± 0.94)	41.53 ± 7.47 (-122.98 ± 16.66)	1.51 ± 0.64 (-78.8 ± 2.19)	1.99 ± 0.87 (-91.04 ± 4.53)
Octocrylene	6197-30-4			9.8 ± 1.83 (-60.01 ± 2.73)	16.59 ± 1.08 (-79.19 ± 5.43)
Comparison of viability in NHEK and NKTC monolayer cells in WST8 and Celltiter-Glo assays upon treatment with 46 chemicals. The viability activity was normalized to the percentage of positive control. The mean and SD of IC50 and efficacy was calculated by 3 replicate plates.
