# Supplementary material for: Two-Dimensional Cellular and Three-Dimensional Bio-Printed Skin Models to Screen Topical-Use Compounds for Irritation Potential
Source: Front Bioeng Biotechnol. 2020 Feb 21;8:109. doi: 10.3389/fbioe.2020.00109 (PMC7046801; doi:10.3389/fbioe.2020.00109)
Supplement: TABLE S2 — Comparison of RhE and FTS constructs on viability and TEER upon treatment with the 46 most toxic compounds. [file Table_2.XLSX]

## Sheet: Sheet1
Supplemental Table 2. Comparison of RhE and FTS constructs on viability and TEER upon treatment with the 46 most toxic compounds.
Sample Name	CAS No.	GHS Label	RhE Celltiter-Glo 3D		FTS Celltiter-Glo 3D		RhE TEER		FTS TEER
			Average of Normalized Cell Viability	SD of Normalized Cell Viability	Average of Normalized Cell Viability	SD of Normalized Cell Viability	Average of Normalized TEER	SD of Normalized TEER	Average of Normalized TEER	SD of Normalized TEER
1-Chloro-2,4-dinitrobenzene	97-00-7	H310;H311;H315;H317;H318;	0.780366	0.532534	1.44718	1.14539	0.629207	0.277937	0.350087	0.0692126
C.I. Basic Violet 14	632-99-5	H315;H319;	0.753	0.462825	2.02386	1.47091	0.675296	0.165629	0.622634	0.19493
Methyl Violet*	1733-13-7	H318;H319;	0.249976	0.226395	1.34121	1.31892	0.391688	0.119706	0.250641	0.0197251
Isodecyl acrylate	584-13-4	H315;H319;	0.964888	0.472674	1.1385	0.760979	0.846758	0.0994141	0.673886	0.325932
Pentachlorophenol*	87-86-5	H310;H311;H315;H319;	0.276326	0.132801	2.43371	2.54369	0.375787	0.0507196	1.11424	0.494076
D&C Red 27*	13473-26-2	N/A	0.69236	0.452863	1.48387	1.16078	0.964986	0.34009	0.517814	0.245817
Diphenylcyclopropenone	886-38-4	H315;H317;	0.889637	0.467713	1.54315	1.00311	0.659103	0.105125	0.464495	0.141583
Vitamin D3	67-97-0	H311;	0.861762	0.438253	1.6525	1.65008	0.909811	0.117795	0.398611	0.156024
Climbazole	38083-17-9	N/A	0.978853	0.506106	1.43322	1.06028	0.974036	0.181361	0.289493	0.131686
Ketoconazole	65277-42-1	N/A	0.974068	0.475357	1.21677	1.06006	0.791363	0.115868	0.364967	0.135806
Hydroquinone	123-31-9	H317;H318;	0.927876	0.439441	1.79682	0.661321	1.26321	0.335442	0.546664	0.198855
Chlorothalonil	1897-45-6	H317;H318;H319;	0.988302	0.488649	1.30503	1.24069	0.897098	0.118294	0.857651	0.526427
Glutaraldehyde	111-30-8	H312;H314;H317;H318;	1.06578	0.51614	2.22881	2.10034	1.13725	0.265901	0.442258	0.211807
Triclosan	3380-34-5	H315;H319;	0.946354	0.452616	1.83063	1.69829	1.07453	0.320588	0.801273	0.286413
Bisphenol A diglycidyl ether	1675-54-3	H315;H317;H319;	1.01272	0.454762	1.74188	1.62626	1.08475	0.330942	0.779036	0.0414711
Benzethonium chloride*	121-54-0	H314;H315;H318;H319;	0.575164	0.302382	1.3915	0.84056	0.730252	0.392109	0.280896	0.0474782
Hexachlorophene*	70-30-4	H311;	0.210331	0.107973	0.524063	0.394702	0.217955	0.043297	0.156568	0.0141016
7,12-Dimethylbenz(a)anthracene	57-97-6	N/A	0.765048	0.358634	2.06698	2.1173	1.03995	0.286834	0.513185	0.153171
2,4-Dihydroxybenzophenone	131-56-6	H315;H319;	1.04197	0.500632	2.06533	1.18745	1.10937	0.192322	0.457882	0.145473
Benzyldimethyldodecylammonium chloride*	139-07-1	H312;H314;H315;H319;	0.351488	0.284437	1.64499	1.47769	0.70838	0.40266	0.424485	0.235835
Bronopol	52-51-7	H310;H312;H315;H318;	1.09008	0.552267	1.03123	0.363204	1.0335	0.250744	0.781599	0.366574
Trimethylolpropane triacrylate	15625-89-5	H315;H317;H319;	0.960322	0.453944	1.368	0.820659	1.21679	0.386031	0.527403	0.291474
Phenylmercuric acetate	62-38-4	H310;H314;H317;H318;	0.8449	0.395089	1.415	1.09935	0.794587	0.445097	0.416632	0.131909
Phenylacetaldehyde	122-78-1	H314;H317;H318;	1.05143	0.474741	1.64246	0.432111	1.16059	0.133408	0.511532	0.236403
2-Methyl-4-isothiazolin-3-one hydrochloride	26172-54-3	H317;	1.06485	0.472388	1.83267	1.5635	1.11465	0.146579	0.839382	0.496132
Rhodamine B	81-88-9	H318;	0.938682	0.454853	1.99633	1.60835	1.42812	0.354344	0.727536	0.501543
S-Methoprene	65733-16-6	H315;	1.05846	0.497719	1.1076	0.867895	1.14337	0.362169	0.93891	0.568535
1-Dodecyl-2-pyrrolidinone	2687-96-9	H314;H317;	1.05617	0.500938	1.45174	1.84449	1.15927	0.272512	1.01414	0.250665
Sodium lauryl polyoxyethylene ether sulfate	9004-82-4	H315;H318;H319;	1.03817	0.50631	1.87963	1.07302	1.27578	0.240557	1.09258	1.04338
Dodecanoic acid	143-07-7	H315;H319;	1.01214	0.462958	2.70149	2.25695	1.10542	0.172874	1.16657	0.763116
Propylene glycol diacetate	623-84-7	H312;H315;H319;	1.07859	0.546925	1.34963	0.993325	1.17081	0.175248	1.20212	0.864165
Enzacamene	36861-47-9	N/A	1.12958	0.539204	2.15855	2.4587	1.04815	0.145456	0.368769	0.0731738
Potassium dichromate	7778-50-9	H317;	0.97733	0.466805	1.38077	0.819919	1.36778	0.36604	1.07539	0.806506
p-Methylaminophenol sulfate	55-55-0	H317;H319;	0.857263	0.469073	2.20119	1.65228	1.29172	0.197195	0.931636	0.325001
Dodecylbenzenesulfonic acid	121-65-3	H311;H312;H314;H318;H319;	1.02976	0.474835	1.65581	1.23855	1.24116	0.19388	0.69232	0.346648
2-Hydroxyethyl acrylate	818-61-1	H311;H314;H317;	1.05338	0.503436	1.83765	1.77609	1.15583	0.162486	1.69893	1.18848
1,3-Butanediol	107-88-0	H315;H319;	1.06566	0.533484	1.38152	0.842235	0.97704	0.354174	0.902124	0.669077
4'-Methoxyacetophenone	100-06-1	N/A	1.10708	0.52849	1.86006	1.20138	1.02372	0.191377	0.790361	0.246731
Abietic acid	514-10-3	H315;H317;H319;H320;	1.21495	0.518544	1.16986	0.920429	0.856064	0.499948	0.770439	0.750783
Propyl gallate	121-79-9	H317;	0.94878	0.494266	2.05519	1.58511	1.3119	0.227864	0.465405	0.249074
Ensulizole	27503-81-7	H315;H319;	1.0831	0.500906	1.69772	1.29896	0.956267	0.158896	0.451104	0.0138256
Pyrethrins	121-21-1	H312;H316;H317;H320;	1.04097	0.504527	1.636	1.00344	0.958831	0.161925	0.956931	0.129269
2-tert-Butylcyclohexyl acetate	20298-70-8	N/A	1.06947	0.513474	2.00652	1.15879	1.15711	0.333781	0.428867	0.142362
tert-Butylhydroquinone	1948-33-0	N/A	1.03539	0.514681	1.07128	0.981174	0.990889	0.144593	0.620154	0.48902
Methylrosaniline chloride*#	121-21-1	H315;H317;H318;	0.0757328	0.0352662	0.212914	0.153325	0.991255	0.161375	0.196826	0.0358148
Octocrylene	6197-30-4	N/A	0.778857	0.448759	1.99363	2.13379	0.996348	0.17439	0.306026	0.040212
* Significant reduction of tissue viability in RhE.
# Significant reduction of tissue viability in FTS.
The luminescence activity (indicating viablity) was normalized to the fold of change over 1% DMSO (vehicle control). The mean and SD were calculated from 3 replicate plates and reported as fold of change over vehicle control. Raw reads of the TEER value (Ω*cm2) of tissues were reported in Figure 3 after 50 compounds treatment in 3 replicate plates. The mean and SD of the TEER values in this table…
