# Supplementary material for: Two-Dimensional Cellular and Three-Dimensional Bio-Printed Skin Models to Screen Topical-Use Compounds for Irritation Potential
Source: Front Bioeng Biotechnol. 2020 Feb 21;8:109. doi: 10.3389/fbioe.2020.00109 (PMC7046801; doi:10.3389/fbioe.2020.00109)
Supplement: TABLE S4 — Cell viability of all topical-use compounds in NKTC and NHEK cells measured by CellTiter-Glo and WST-8. [file Table_4.xlsx]

## Sheet: Sheet1
Supplemental Table 4. Cell viability of all topical-use compounds in NKTC and NHEK cells measured by CellTiter-Glo and WST-8.
Sample Name	CAS No.	GHS labeling	NKTC Cells		NHEK Cells
			WST-8 Assay, IC50 (Efficacy)	Celltiter-Glo, IC50 (Efficacy)	WST-8 Assay, IC50 (Efficacy)	Celltiter-Glo, IC50 (Efficacy)
1-Chloro-2,4-dinitrobenzene	97-00-7	H310;H311;H315;H317;H318;	9.18 ± 5.34 (-91.52 ± 11.24)	9.18 ± 5.34 (-97.83 ± 5.24)	4.76 ± 1.16 (-82.48 ± 2.48)	5.43 ± 0 (-84.46 ± 2.29)
Dodecylbenzenesulfonic acid	27176-87-0	H311;H312;H314;H318;H319;	23.02 ± 10.81 (-107.15 ± 6.97)	29.89 ± 13.03 (-111.81 ± 5.68)	29.46 ± 29.13 (-98.06 ± 3.38)	25.8 ± 26.33 (-96.22 ± 3.96)
Phenylmercuric acetate	62-38-4	H310;H314;H317;H318;	0.38 ± 0.15 (-103.73 ± 10.57)	0.37 ± 0.16 (-98.56 ± 4.55)	0.01 ± 0 (-102.68 ± 5.37)	0.06 ± 0.02 (-104.98 ± 1.74)
Pentachlorophenol	87-86-5	H310;H311;H315;H319;	1.18 ± 1.69 (-59.74 ± 3.42)	4.23 ± 4.29 (-71.77 ± 16.3)	0.12 ± 0.04 (-68.31 ± 4.68)	0.51 ± 0.14 (-71.37 ± 3.26)
Trimethylolpropane triacrylate	15625-89-5	H315;H317;H319;	24.95 ± 0 (-100.77 ± 4.64)	20.63 ± 1.4 (-113.95 ± 3.85)	24.95 ± 0 (-101.23 ± 1.59)	24.95 ± 0 (-94.19 ± 3.82)
p-Methylaminophenol sulfate	55-55-0	H317;H319;	13.88 ± 3.87 (-102.13 ± 16.71)	24.32 ± 13.22 (-112.78 ± 16.68)	8.53 ± 0.56 (-93.19 ± 6.41)	6.78 ± 0.44 (-97.05 ± 1.49)
Vitamin D3	67-97-0	H311;	0.66 ± 0.44 (11.02 ± 12.92)	4.08 ± 7.02 (12.32 ± 0.93)	12.68 ± 0.86 (-59.03 ± 6.07)	13.73 ± 1.58 (-64.59 ± 1.57)
Methylrosaniline chloride	548-62-9	H318;	42.76 ± 2.79 (-107.47 ± 0.94)	41.53 ± 7.47 (-122.98 ± 16.66)	1.51 ± 0.64 (-78.8 ± 2.19)	1.99 ± 0.87 (-91.04 ± 4.53)
2-Methyl-4-isothiazolin-3-one hydrochloride	26172-54-3	H317;	44.67 ± 7.24 (-33.53 ± 43.02)	60.06 ± 14.52 (-35.38 ± 49.56)	32.25 ± 12.63 (-70.8 ± 50.19)	39.87 ± 28.43 (-72.73 ± 40.39)
Benzethonium chloride	121-54-0	H314;H315;H318;H319;	27.58 ± 24.6 (-97.88 ± 11.47)	32.12 ± 21.97 (-109.54 ± 10.76)	3.43 ± 0.58 (-85.05 ± 1.36)	3.49 ± 0.97 (-82.35 ± 3.13)
Potassium dichromate	7778-50-9	H317;	2.3 ± 0.74 (-71.62 ± 7.64)	2.53 ± 0.53 (-87.05 ± 6.73)	1.97 ± 1.09 (-83.88 ± 6.58)	1.66 ± 0.62 (-83.8 ± 1.13)
Hexachlorophene	70-30-4	H311;	2.28 ± 0.89 (-102.5 ± 16.31)	18.78 ± 26.91 (-116.34 ± 15.82)	0.37 ± 0.02 (-92.29 ± 4.06)	0.39 ± 0.1 (-96.83 ± 7.72)
1,3-Butanediol	107-88-0	H315;H319;	26.57 ± 5.99 (-17.94 ± 4)		5.52 ± 1.38 (-57.06 ± 6.39)	13.45 ± 3.96 (-103.47 ± 2.84)
1,2-Benzisothiazolin-3-one	2634-33-5	H315;H317;H318;	21.42 ± 7.02 (-104.17 ± 9.69)	15.95 ± 2.98 (-107.04 ± 7.99)	1.68 ± 0.5 (-93.41 ± 4.51)	1.26 ± 0.14 (-83.03 ± 3.73)
Trichloroacetonitrile	545-06-2	H317;H318;H319;	6.07 ± 3.62 (-106.12 ± 6.3)	5.34 ± 2.01 (-105.46 ± 4.25)	1.2 ± 0.57 (-100.53 ± 2.1)	0.8 ± 0.5 (-96.01 ± 5.94)
Bronopol	52-51-7	H310;H312;H315;H318;	53.84 ± 3.51 (-94.16 ± 4.99)	73.19 ± 4.95 (-122.64 ± 4.36)	24.95 ± 0 (-95.67 ± 2.22)	24.05 ± 1.57 (-91.91 ± 3.26)
Triclocarban	101-20-2	N/A	3.28 ± 0.42 (-43.32 ± 2.94)	6.78 ± 0.44 (-72.48 ± 15.46)	2.31 ± 0.16 (-68.51 ± 2.7)	2.7 ± 0.18 (-93.3 ± 1.26)
Hydramethylnon	67485-29-4	H319;H320;	51.26 ± 14.28 (-93.18 ± 2.55)	38.91 ± 9.45 (-105.07 ± 5.03)	26.98 ± 1.76 (-99.12 ± 4.2)	17.02 ± 1.11 (-98.92 ± 1.54)
Dodecyl gallate	1166-52-5	H317;	7.42 ± 2.78 (-30.59 ± 13.71)	5.87 ± 1.06 (-33.31 ± 12.34)	23.53 ± 10.15 (-58.04 ± 3.02)	20.98 ± 4.73 (-82.03 ± 10.5)
Isodecyl acrylate	1330-61-6	H315;H319;	8.68 ± 1.41 (-23.64 ± 3.02)	21.32 ± 5.18 (-23.19 ± 1.27)	1.54 ± 0.51 (-56.88 ± 3.41)	3.55 ± 1.14 (-96.64 ± 3.89)
Methyl Violet	8004-87-3	H318;H319;	0.91 ± 0.43 (-12.51 ± 10.84)	18.22 ± 4.11 (-36.67 ± 4.25)	0.51 ± 0.09 (-64.75 ± 5.35)	0.64 ± 0.12 (-86.89 ± 2.16)
C.I. Basic Violet 14	632-99-5	H315;H319;	17.52 ± 4.01 (-47.49 ± 1.22)	19.4 ± 2.23 (-38.46 ± 5.96)	0.65 ± 0.49 (-45.27 ± 6.6)	1.16 ± 1.11 (-71.09 ± 5.32)
Benzyldimethyldodecylammonium chloride	139-07-1	H312;H314;H315;H319;	22.25 ± 7.94 (-109.75 ± 20.96)	43.14 ± 7.35 (-61.18 ± 32.03)	3.36 ± 0.99 (-97.27 ± 8.17)	2.91 ± 0.99 (-96.93 ± 4.18)
Bisphenol A diglycidyl ether	1675-54-3	H315;H317;H319;	65.2 ± 22.19 (-96.19 ± 20.93)	71.23 ± 13.31 (-100.41 ± 12.48)	43.66 ± 10.61 (-96.76 ± 13.65)	39.11 ± 10.9 (-93.84 ± 6.79)
1-Dodecyl-2-pyrrolidinone	2687-96-9	H314;H317;	29.71 ± 2.42 (-31.3 ± 27.71)	29.14 ± 1.97 (-52.75 ± 4.82)	15.81 ± 1.82 (-53.56 ± 7.12)	18.38 ± 1.24 (-69.5 ± 2.91)
2-Hydroxyethyl acrylate	818-61-1	H311;H314;H317;	20.59 ± 30.92 (-5.3 ± 32.94)		17.44 ± 4.36 (-82.77 ± 4.08)	35.07 ± 9.77 (-95.5 ± 6.22)
Propylene glycol diacetate	623-84-7	H312;H315;H319;	25.4 ± 5.81 (-37.2 ± 12.21)	18.85 ± 16.49 (-1.18 ± 28.41)	27.69 ± 7.72 (-67.39 ± 4.36)	35.73 ± 7.48 (-88.11 ± 6.1)
Octocrylene	6197-30-4	N/A			9.8 ± 1.83 (-60.01 ± 2.73)	16.59 ± 1.08 (-79.19 ± 5.43)
Ketoconazole	65277-42-1	N/A	2.17 ± 1.88 (-5.28 ± 20.24)	2.55 ± 1.25 (-14.25 ± 8.51)	14.02 ± 9.17 (-73.35 ± 19.68)	26.41 ± 3.63 (-78.58 ± 3.34)
Zinc pyrithione	13463-41-7	N/A	33 ± 13.87 (40.62 ± 86.25)	40.11 ± 2.71 (94.12 ± 5.59)	0 ± 0 (-29.79 ± 32.51)	12.85 ± 22.25 (-12.35 ± 118.27)
Polyethylene glycol (20) hexadecyl ether	9004-95-9	H315;	22.61 ± 24.42 (-4.49 ± 14.22)		13.28 ± 6.24 (-54.65 ± 7.48)	16.58 ± 5.43 (-41.15 ± 10.72)
Niacinamide	98-92-0	H315;H319;	0.04 ± 0.02 (5.37 ± 4.79)		0.08 ± 0.03 (27.33 ± 5.07)	1.9 ± 1.51 (-4.3 ± 4.03)
Pyriproxyfen	95737-68-1	N/A	13.53 ± 18.95 (23.29 ± 13.35)	35.19 ± 49.69 (8.63 ± 8.09)	17.91 ± 3.75 (-37.32 ± 12.39)	43.55 ± 10.88 (-27.09 ± 6.8)
N,N-Bis(2-hydroxyethyl)dodecanamide	120-40-1	H315;H318;H319;	3.63 ± 3.34 (15.9 ± 2.59)	0.15 ± 0.21 (2.18 ± 13.9)	45 ± 3.05 (18.41 ± 54.64)	11.52 ± 5.41 (-23.09 ± 21.14)
D-Mannitol	69-65-8	H315;H319;		0.45 ± 0.07 (-3.8 ± 3.58)	5.45 ± 8.92 (-30.64 ± 9.87)	0.26 ± 0.26 (-22.93 ± 11.45)
Hexyl cinnamic aldehyde	3033-62-3	H315;H317;	8.35 ± 8.23 (21.07 ± 10.26)		0.02 ± 0.01 (12.03 ± 4.86)	2.6 ± 0.77 (30.01 ± 0.45)
Dinitrochlorobenzene	131-17-9	H310;H311;H315;H317;H318;	35.74 ± 2.42 (-112.16 ± 5.64)	31.86 ± 2.16 (-103.67 ± 3.74)	19.4 ± 2.23 (-107.02 ± 0.75)	33.71 ± 8.42 (-105.7 ± 14.84)
2,4-Dihydroxybenzophenone	131-56-6	H315;H319;	54.08 ± 7.44 (-38.57 ± 10.53)	0.02 ± 0.02 (6.07 ± 5.5)	44.37 ± 0 (-65.23 ± 4.1)	58.13 ± 3.94 (-61.43 ± 7.55)
S-Methoprene	65733-16-6	H315;	30.01 ± 50.69 (4.95 ± 36.24)	0.98 ± 0.39 (8.89 ± 9)	82.47 ± 10.51 (-84.59 ± 35.88)	82.47 ± 10.51 (-95.94 ± 4.07)
1,3-Benzenedimethanamine	1477-55-0	H312;H314;H317;H318;	10.6 ± 10 (14.47 ± 13.66)	22.63 ± 30.75 (-1.65 ± 7.67)	12.05 ± 3.95 (40.04 ± 40.87)	13.37 ± 6.8 (21.42 ± 4.34)
7,12-Dimethylbenz(a)anthracene	57-97-6	N/A	46.18 ± 3.13 (-90.26 ± 21.32)	46.18 ± 3.13 (-53.54 ± 23.81)	46.18 ± 3.13 (-95.74 ± 6.28)	46.18 ± 3.13 (-95.54 ± 3.27)
1,2-Dibromo-2,4-dicyanobutane	35691-65-7	H315;H317;H318;	88.54 ± 0 (-93.07 ± 14.61)	77.65 ± 18.86 (-83.74 ± 27)	88.54 ± 0 (-111.44 ± 1.4)	60.41 ± 3.94 (-86.17 ± 7.7)
3-Iodo-2-propynyl-N-butylcarbamate	55406-53-6	H315;H317;H318;	0.68 ± 0.81 (10.4 ± 9.37)		88.54 ± 0 (-101.87 ± 6.07)	76.71 ± 13.07 (-86.55 ± 10.34)
Hydroquinone	123-31-9	H317;H318;	15.61 ± 3.57 (-27.85 ± 15.71)	0.37 ± 0.34 (-16.7 ± 14.62)	43.24 ± 0 (-106.87 ± 6.68)	28.39 ± 1.92 (-100.85 ± 4.01)
Triclosan	3380-34-5	H315;H319;	87.38 ± 5.69 (-115.68 ± 16.45)	90.67 ± 0 (-127.87 ± 8.24)	90.67 ± 0 (-126.89 ± 6.54)	55.13 ± 3.59 (-96.28 ± 3.92)
4'-Methoxyacetophenone	100-06-1	N/A		0.51 ± 0.68 (-10.34 ± 4.6)	53.37 ± 3.61 (-65.64 ± 15.78)	55.46 ± 3.61 (-75.27 ± 24.88)
Glutaraldehyde	111-30-8	H312;H314;H317;H318;	88.01 ± 0 (-97.73 ± 14.91)	88.01 ± 0 (-89.85 ± 22.92)	24.44 ± 21.79 (-100.19 ± 12.28)	20.23 ± 7.92 (-96.9 ± 6.82)
Enzacamene	36861-47-9	N/A	88.54 ± 0 (-79.16 ± 68.57)	71.58 ± 16.37 (-86.58 ± 58.29)	88.54 ± 0 (-116.72 ± 6.17)	71.3 ± 14.93 (-96.84 ± 12.69)
Sodium lauryl polyoxyethylene ether sulfate	9004-82-4	H315;H318;H319;	72.2 ± 23.1 (-43.22 ± 37.52)	63.19 ± 43.9 (-25.88 ± 44.88)	39.68 ± 20.18 (-55.67 ± 15.85)	69.5 ± 32.98 (-56.17 ± 7.26)
Dodecanoic acid	143-07-7	H315;H319;	88.54 ± 0 (-79.93 ± 6.24)	88.54 ± 0 (-67.53 ± 14.48)	58.13 ± 3.94 (-68.4 ± 13.15)	58.13 ± 3.94 (-59.53 ± 12.25)
Pyridoxine hydrochloride	58-56-0	H315;H318;H319;	2.72 ± 2.44 (24.62 ± 4.53)	0.67 ± 0.69 (13.16 ± 1.74)	33.71 ± 34.12 (97.93 ± 124.83)	11.6 ± 11.76 (21.09 ± 7.88)
N,N'-Di-2-naphthyl-p-phenylenediamine	93-46-9	H315;H317;H319;	0.84 ± 1.44 (27.36 ± 6.67)	39.21 ± 33.19 (10.35 ± 9.77)	1.87 ± 3.22 (-12.65 ± 55.84)	8.37 ± 14.36 (24.31 ± 14.96)
Benzyl benzoate	120-51-4	N/A	2.26 ± 1.79 (12.11 ± 1.33)	0.15 ± 0.06 (16.7 ± 13.35)	17.47 ± 12.97 (187.38 ± 146.74)	1.89 ± 0.56 (15.89 ± 4.64)
tert-Butylhydroquinone	1948-33-0	H312;H315;H317;H319;	34.66 ± 13.73 (-17.04 ± 20.74)	58.13 ± 3.94 (-61.68 ± 7.6)	88.54 ± 0 (-116.31 ± 2.36)	77.65 ± 18.86 (-100.16 ± 13.74)
Hydroquinone	123-31-9	H317;H318;		24.86 ± 21.25 (-3.56 ± 13.95)	88.54 ± 0 (-117.55 ± 4.98)	53.84 ± 3.51 (-96.94 ± 6.03)
Pramoxine hydrochloride	637-58-1	H315;H319;	1.69 ± 1.3 (2.66 ± 8.16)	8.61 ± 12.17 (-5.76 ± 5.39)	21.77 ± 2.5 (-45.22 ± 8.68)	19.4 ± 2.23 (-31.24 ± 3.54)
Octanal	124-13-0	H315;H319;		1.15 ± 0.91 (-12.92 ± 1.19)	30.41 ± 4.19 (-31.02 ± 17.61)	31.97 ± 7.31 (-30.86 ± 9.73)
Decyl beta-D-glucopyranoside	58846-77-8	H315;H319;	14.02 ± 19.77 (11.42 ± 14.37)	14 ± 19.79 (11.12 ± 13.34)	62.96 ± 7.24 (-44.29 ± 8)
Ensulizole	27503-81-7	H315;H319;	15.34 ± 0 (-0.91 ± 11.13)	23.54 ± 3.24 (-49.27 ± 9.67)		18.78 ± 3.2 (-43.18 ± 1.4)
Bisphenol A glycidyl methacrylate	1565-94-2	H315;H317;H318;H319;	76.01 ± 24.9 (-16.42 ± 5.28)	37.86 ± 45.61 (-14.3 ± 4.96)	67 ± 19.73 (-37.36 ± 9.05)	47.98 ± 3.13 (-44.27 ± 3.34)
Rhodamine B	81-88-9	H318;	19.15 ± 31.8 (-24.41 ± 10.42)	10.94 ± 8.7 (-34.33 ± 8.62)		42.76 ± 2.79 (-58.94 ± 6.6)
Sulfan blue	129-17-9	H315;H319;	29.67 ± 50.98 (5.88 ± 17.86)	15.48 ± 13.73 (-24.29 ± 10.87)		41.33 ± 5.27 (-53.22 ± 5.39)
Phthalic anhydride	60-33-3	H315;H317;H318;	12.76 ± 12.6 (-2.26 ± 22.88)	28.17 ± 9.07 (-33.37 ± 11.06)	10.86 ± 15.29 (-6.32 ± 27.77)	30.61 ± 0 (-31.15 ± 27.59)
Sodium benzoate	532-32-1	H315;H317;H318;	3.95 ± 5.58 (-0.04 ± 12.43)	3.22 ± 4.89 (14 ± 4.81)	10.79 ± 12.77 (-7.18 ± 29.94)	6.61 ± 11.44 (-32.18 ± 21.98)
Trichloroethylene	79-01-6	H315;H319;	7.05 ± 9.36 (23.46 ± 5.44)	14.71 ± 24.71 (11.4 ± 0.72)	9.92 ± 12.75 (39.22 ± 26.95)	5.7 ± 5.63 (32.23 ± 4.55)
Pyrethrins	8003-34-7	H312;H316;H317;H320;	2.59 ± 3.05 (16.16 ± 5.16)	7.56 ± 3 (17.21 ± 18.47)	34.76 ± 15.99 (-57.96 ± 25.75)	24.08 ± 20.94 (-28.75 ± 42.47)
Propylene glycol	120-40-1	H312;H315;H318;H319;	0.04 ± 0.02 (9.82 ± 9.99)	0.23 ± 0.29 (6.68 ± 5.8)	6.31 ± 2.03 (35.93 ± 23.24)	5.77 ± 2.71 (16.11 ± 13.99)
FD&C Green No. 3	2353-45-9	H315;H319;	1.59 ± 1.57 (6.15 ± 5.48)	35.31 ± 2.39 (-29.96 ± 11.73)		28.05 ± 1.9 (-41.96 ± 1.87)
Chlorophyllide Cu complex sodium salt	11006-34-1	N/A	15.34 ± 0 (-34.48 ± 29.97)	9.09 ± 11.49 (8.23 ± 8.04)	15.34 ± 0 (-81.91 ± 7.97)	15.34 ± 0 (-101.19 ± 17.38)
Climbazole	38083-17-9	N/A		0.02 ± 0.01 (-7.6 ± 6.61)	0.54 ± 0 (-47.37 ± 42.07)	0.42 ± 0.11 (-71.38 ± 28.89)
Chlorphenesin	104-29-0	H312;H315;H318;H319;			4.55 ± 6.42 (11.29 ± 44.75)	45.99 ± 38.78 (-29.53 ± 3.58)
FD&C Yellow 5	1934-21-0	N/A	1.37 ± 1.02 (24.61 ± 12.6)	18.81 ± 14.91 (3.95 ± 18.25)	13.13 ± 11.31 (58.87 ± 12.99)	2.21 ± 3.78 (25.01 ± 1.54)
1,4-Benzenediamine	106-50-3	H311;H317;H319;	75.07 ± 6.1 (-19.01 ± 16.49)		38.5 ± 35.72 (-26.92 ± 8.32)	49.71 ± 27.49 (-9.17 ± 3.25)
Allura Red C.I.16035	25956-17-6	N/A	2.99 ± 2.61 (14.3 ± 5.18)	3.79 ± 4.39 (18.34 ± 13.63)	14.96 ± 21.37 (3.2 ± 33.35)
2,4-Diaminotoluene	95-80-7	H312;H317;	0.17 ± 0.11 (-7.81 ± 7.01)		45.55 ± 14.58 (11.79 ± 10.22)	9.34 ± 16.16 (-22.36 ± 11.87)
2-tert-Butylcyclohexyl acetate	88-41-5	N/A	5.19 ± 6.71 (-20.49 ± 23.21)	4.14 ± 4.09 (-5.15 ± 4.51)	8.1 ± 2.59 (-27.24 ± 23.62)	0.85 ± 0.21 (-31.94 ± 28.36)
Masoprocol	27686-84-6	H315;H319;	34.48 ± 12.56 (-6.64 ± 17.57)		5.75 ± 5.73 (18.97 ± 4.91)	12.47 ± 6.66 (-25.87 ± 6.42)
Propyl gallate	121-79-9	H317;	31.41 ± 0 (-40.51 ± 21.64)	47.98 ± 3.13 (-49.77 ± 3.2)	52.83 ± 4.3 (-20.05 ± 17.43)	50.42 ± 9.42 (-33.63 ± 6.41)
N,N-dimethylbenzylamine	3380-34-5	H311;H312;H314;H318;		1.18 ± 1.95 (17.91 ± 10.33)	2.38 ± 3.88 (20.56 ± 5.2)	7.11 ± 6.13 (27.75 ± 3.38)
Resorcinol	108-46-3	H315;H319;
Basic Blue 7	2390-60-5	N/A		1.69 ± 2.82 (-14.95 ± 12.06)	53.51 ± 3.49 (-30.96 ± 7.54)	34.65 ± 39.11 (-22.05 ± 28.58)
Sorbic acid	110-44-1	H315;H319;	8.01 ± 4.33 (23.12 ± 2.15)	0.13 ± 0.19 (15.73 ± 4.94)	32.63 ± 20.16 (36.71 ± 18.86)	28.8 ± 16.65 (15.33 ± 4.71)
Abietic acid	143-07-7	H315;H317;H319;H320;	2.29 ± 0.52 (23.34 ± 12.66)	0.44 ± 0.6 (13.57 ± 15.99)	27.39 ± 9.97 (-47.85 ± 2.47)	34.13 ± 17.02 (-52.07 ± 0.74)
FD&C Yellow 6	2783-94-0	H315;H317;H319;	31.35 ± 44.31 (12.46 ± 12.71)		32.34 ± 9.01 (30.14 ± 12.21)	0.15 ± 0.19 (5.06 ± 4.76)
Nickel(II) chloride	7718-54-9	H315;H317;	26.59 ± 23.93 (-45.8 ± 10.25)	1.6 ± 1.27 (-19.84 ± 24.84)	53.67 ± 22.56 (-34 ± 5.35)	33.23 ± 28.59 (-14.22 ± 10.72)
Finasteride	98319-26-7	N/A	0.08 ± 0.07 (-6.96 ± 8.2)	12.48 ± 17.64 (-7.46 ± 7.69)	40.51 ± 35.39 (-26.17 ± 8.64)
Permethrin	52645-53-1	H317;		8.88 ± 11.64 (16.55 ± 8.14)
Methyl 2-octynoate	111-12-6	H317;	30.9 ± 23.64 (26.8 ± 4.44)	0.21 ± 0.14 (8.12 ± 7.31)	26.79 ± 18.49 (29.83 ± 2.12)	26.83 ± 6.49 (27.47 ± 0.72)
C.I. Acid Orange 10	1936-15-8	H315;H319;	16.51 ± 20.56 (22.57 ± 4.36)	0.3 ± 0.51 (15.73 ± 3.27)	7.78 ± 6.32 (26.13 ± 4.43)	0.08 ± 0.02 (11.7 ± 2.77)
Methyl 2-nonynoate	111-80-8	H315;H317;	0.01 ± 0 (27.96 ± 1.04)	0.34 ± 0.4 (16.19 ± 4.36)	3.36 ± 5.69 (34.26 ± 18.63)	0.19 ± 0.08 (12.29 ± 4.4)
Chloroallyl methenamine chloride	51229-78-8	H311;H315;H317;H319;		40.05 ± 44.8 (-8.23 ± 3.86)	73.85 ± 13.28 (-43.35 ± 17.1)	65.82 ± 11.84 (-49.38 ± 16.72)
Ascorbyl palmitate	137-66-6	H319;	30.05 ± 36.26 (20.31 ± 5.48)		11.6 ± 8.89 (18.71 ± 5.06)	65.51 ± 8.35 (-23.58 ± 9.34)
2,4,6-Trinitro-1,3-dimethyl-5-tert-butylbenzene	81-15-2	H320;	7.21 ± 9.64 (21.32 ± 4.78)	1.08 ± 1.03 (15.41 ± 6.84)
Dimethyl adipate	627-93-0	H319;	1.38 ± 1.55 (21.92 ± 7.42)	9.63 ± 8.9 (17.98 ± 7.65)	0.35 ± 0.39 (36.62 ± 6.08)	17.28 ± 23.49 (31.42 ± 0.43)
Methyl 2-aminobenzoate	134-20-3	H319;	2.51 ± 0.41 (8.66 ± 7.7)	2.88 ± 2.96 (3.03 ± 2.64)	13.58 ± 12.99 (7.01 ± 67.09)
Benzoic acid	65-85-0	H319;	3.03 ± 3.01 (20.05 ± 7.96)	0.59 ± 0.51 (4.95 ± 10.89)	22.01 ± 36.85 (27.99 ± 21.78)	0.49 ± 0.28 (12.6 ± 2.58)
D&C Red 27	13473-26-2	N/A	22.28 ± 1.51 (-72.52 ± 3.8)	28.05 ± 1.9 (-71.12 ± 2.72)	26.97 ± 23.36 (-23.83 ± 38.5)	44.85 ± 8.07 (-59.73 ± 12.44)
2-Benzylideneoctanal	101-86-0	H315;H317;	9.93 ± 13.98 (-0.36 ± 7.43)	0.25 ± 0.35 (-8.46 ± 10.53)	39.63 ± 55.55 (6.85 ± 25.92)
Diphenylcyclopropenone	886-38-4	H315;H317;	5.47 ± 0.63 (-59.5 ± 7.44)	5.69 ± 0.73 (-79.48 ± 3.93)	36.58 ± 10.34 (-94.51 ± 15.88)	30.75 ± 3.53 (-90.37 ± 12.42)
Glycolic acid	79-14-1	H314;H318;		0.29 ± 0.3 (-5.05 ± 4.49)	10.53 ± 18.08 (-6.24 ± 20.84)	7.46 ± 3.5 (-31.83 ± 27.62)
Phenylacetaldehyde	122-78-1	H314;H317;H318;	33.08 ± 48.1 (-7.99 ± 61.21)	33.81 ± 47.78 (-4.7 ± 35.15)	88.54 ± 0 (-114.24 ± 8.33)	88.54 ± 0 (-109.35 ± 5.74)
Ethyl 3-(N-butylacetamido)propionate	52304-36-6	H319;	0.12 ± 0.15 (18.38 ± 6.58)		15.75 ± 22.16 (-44.2 ± 94.22)	20.98 ± 18.07 (-64.7 ± 64.04)
Glycerol 1-(p-aminobenzoate)	136-44-7	N/A	10.91 ± 15.22 (-4.93 ± 4.4)	2.36 ± 2.11 (-10.5 ± 10.04)	16.98 ± 23.06 (34.87 ± 30.24)
Triclosan	3380-34-5	H315;H319;	4.28 ± 1.19 (-22.14 ± 3.67)	5.59 ± 1.79 (5.64 ± 31.03)		40.28 ± 5.13 (-43.78 ± 12.12)
3-Phenyl-2-propen-1-ol	104-54-1	H317;H319;	0.02 ± 0.02 (6.45 ± 5.66)	27.71 ± 21.96 (-9.58 ± 8.72)	0.26 ± 0.32 (9.09 ± 8.06)
Dexpanthenol	81-13-0	N/A		2.57 ± 4.43 (15.79 ± 4.1)	28.83 ± 24.96 (75.53 ± 38.68)	0.77 ± 1.08 (25.97 ± 15.74)
Acetyl tributyl citrate	77-90-7	H315;H319;		9.91 ± 14.01 (12.57 ± 13.26)	15.71 ± 22.21 (-3.51 ± 30.82)	0 ± 0 (20.67 ± 3.88)
Zinc chloride	7646-85-7	H314;H318;	50.71 ± 45.8 (14.43 ± 27.45)	1.69 ± 1.98 (-11.57 ± 8.19)	60.32 ± 49.8 (-35.62 ± 56.88)	59.41 ± 51.37 (-48.64 ± 56.47)
1-Amino-2-propanol	78-96-6	H315;H319;	0.32 ± 0.49 (11.82 ± 8.67)		1.32 ± 1.39 (5.08 ± 44.6)	0.04 ± 0.02 (10.16 ± 0.82)
Fluorescein sodium	518-47-8	H319;	0.36 ± 0.47 (-19.5 ± 23.76)	27.31 ± 29.99 (-5.04 ± 4.74)	41.67 ± 2.71 (73.86 ± 34.06)	4.66 ± 4.68 (-21.96 ± 5.91)
4-Aminophenol	123-30-8	H315;H317;H319;	0.01 ± 0 (10.66 ± 10.21)	2.39 ± 0.95 (8.63 ± 8.31)	13.64 ± 19.29 (20.51 ± 17.91)	0.02 ± 0.02 (12.24 ± 10.64)
2-Methyl-4-propyl-1,3-oxathiane	67715-80-4	H319;	0.02 ± 0 (17.99 ± 6.03)	5.01 ± 6.61 (17.32 ± 7.64)	11.16 ± 15.67 (48.46 ± 60.62)	0.08 ± 0.03 (7.92 ± 6.9)
Citral	5392-40-5	H315;H318;	0.65 ± 0.05 (7.15 ± 6.24)	9.66 ± 13.65 (11.33 ± 12.16)	3.43 ± 4.52 (33.59 ± 25.47)	1.61 ± 2.37 (20.02 ± 11.75)
2-Ethylhexyl 4-(dimethylamino)benzoate	21245-02-3	H315;H319;	11.16 ± 15.66 (14.1 ± 12.28)	7.47 ± 6.37 (20.7 ± 13.69)	18.17 ± 9.58 (19.5 ± 9.6)	3.95 ± 5.58 (-18.6 ± 19.28)
Phenol Red sodium salt	34487-61-1	H315;H319;		20.67 ± 15.19 (-15.15 ± 13.25)		79.92 ± 14.93 (-52.86 ± 6.4)
Lactic acid	50-21-5	H314;H315;H318;	0.02 ± 0.01 (4.74 ± 4.2)
beta-Carotene	7235-40-7	H315;H319;	0.73 ± 1.24 (9.89 ± 4.54)	0.04 ± 0.05 (-6.18 ± 6.7)	11.66 ± 16.55 (14.45 ± 5.26)	0.03 ± 0 (11.38 ± 2.53)
7-Hydroxy-3,7-dimethyloctanal	107-75-5	H317;H319;				14.07 ± 19.46 (-4.67 ± 4.04)
Octanoic acid	124-07-2	H314;	1.47 ± 1.45 (-3.46 ± 2.99)
Benzalkonium chloride	8001-54-5	H312;H314;H315;H319;	0.01 ± 0.01 (-2.77 ± 16.22)		66.24 ± 11.28 (-16.35 ± 10.38)
4-Morpholinecarboxaldehyde	4394-85-8	H317;H319;		1.84 ± 1.35 (-24.91 ± 24.36)
3,7-Dimethyloct-6-en-1-yl formate	105-85-1	H315;H317;	0 ± 0 (8.95 ± 7.84)	35.17 ± 49.73 (-9.33 ± 8.62)	0.06 ± 0.09 (5.79 ± 5.3)	0 ± 0 (11.66 ± 2.02)
1,4-Diaminoanthraquinone	128-95-0	H315;H317;H319;	14.99 ± 18.4 (-0.44 ± 11.91)	7.02 ± 9.92 (2.45 ± 12.4)
alpha-Phellandrene	99-83-2	N/A
Methyl dihydrojasmonate	24851-98-7	N/A
Benzyl cinnamate	103-41-3	H317;			2.02 ± 2 (6.63 ± 5.85)	0.01 ± 0 (20.09 ± 3.48)
Glycine	56-40-6	H315;H319;	2.73 ± 3.83 (-6.45 ± 6.26)	0.01 ± 0.02 (-10.15 ± 11.41)
4-Aminobenzoic acid	150-13-0	H315;H319;	8.26 ± 8.16 (-13.79 ± 33.53)	1.25 ± 1.37 (-17.89 ± 23.12)	35.21 ± 49.67 (-8.88 ± 8.78)
Pidolic acid	98-79-3	H315;H319;	0 ± 0 (0.72 ± 14.64)
Hydrocortisone	50-23-7	N/A	7.68 ± 10.84 (13.56 ± 14.87)	24.39 ± 34.11 (2.94 ± 34.26)		3.43 ± 4.84 (-2.51 ± 13.9)
D-Fructose	57-48-7	N/A	6.65 ± 8.75 (10.53 ± 9.12)
Denatonium benzoate	3734-33-6	H315;H318;			0.78 ± 1.25 (14.22 ± 1.22)	0.01 ± 0 (17.9 ± 2.53)
2-Mercaptobenzothiazole	81-13-0	H317;	1.9 ± 3.19 (-13.04 ± 26.77)		0.31 ± 0.26 (11.41 ± 2.77)	0.1 ± 0.02 (16.16 ± 3.62)
Diisobutyl adipate	141-04-8	H319;
Piperonyl butoxide	51-03-6	N/A			28.29 ± 28.27 (-5.98 ± 23.57)	5.03 ± 5.03 (-1.65 ± 15.5)
Amiloxate	71617-10-2	N/A
Neomycin sulfate	1405-10-3	H317;		0.54 ± 0.77 (-4.79 ± 17.8)	32.92 ± 9.74 (23.12 ± 5.74)	23.36 ± 9.82 (21.06 ± 3.06)
2-Methyl-4-propyl-1,3-oxathiane	67715-80-4	N/A	0.41 ± 0.03 (1.99 ± 8.34)			11.43 ± 11.22 (-12.85 ± 2.82)
2-Nitro-1,4-phenylenediamine	5307-14-2	H315;H317;H319;		37.89 ± 9.16 (2.79 ± 24.43)		0.49 ± 0.42 (13.14 ± 13.01)
Melatonin	73-31-4	H312;
Isopropyl tetradecanoic acid	110-27-0	H315;	2.13 ± 2.47 (5.07 ± 14.58)		42.46 ± 28.6 (-10.39 ± 9.53)
(1R,2S,5R)-(-)-Menthol	2216-51-5	H315;H319;	2.14 ± 3.57 (10.75 ± 2.02)	0.87 ± 0.34 (-3.12 ± 2.7)		13.59 ± 16.07 (-5.35 ± 6.13)
2-Octyl-1-dodecanol	5333-42-6	H315;H319;				2.32 ± 3 (-6.88 ± 6.21)
Tromethamine	77-86-1	H315;H319;
Thymol	89-83-8	H314;H318;		12.69 ± 13.5 (-7.42 ± 6.5)
Methanol	67-56-1	H311;			0.01 ± 0 (5.11 ± 4.45)	31.03 ± 6.5 (18.38 ± 4.32)
2-Amino-2-methyl-1-propanol	124-68-5	H319;	18.36 ± 15.54 (-7.31 ± 7.86)			54.81 ± 9.86 (26.96 ± 4.89)
alpha-Pinene	80-56-8	H315;H317;H319;	30.73 ± 41.78 (13.34 ± 5.68)		0.04 ± 0.04 (10.63 ± 1.46)	13.82 ± 16.01 (15 ± 3.41)
Glycerol	56-81-5	H315;H317;H318;H319;			42.22 ± 40.54 (23.23 ± 5.33)	0.01 ± 0 (-21.11 ± 20.87)
Methylionone	1335-46-2	H317;	7.87 ± 11.13 (-0.04 ± 14.59)	1.2 ± 0.81 (-6.07 ± 5.59)		37.58 ± 22.46 (-9.39 ± 2.59)
Dibutyl phthalate	84-74-2	H317;	0 ± 0 (10.67 ± 9.7)	1.55 ± 0.61 (-4.11 ± 3.63)		0 ± 0 (12.75 ± 1.96)
Sorbitan monododecanoate	1338-39-2	H315;H318;H319;	19.17 ± 18.9 (3.58 ± 20.86)
Octanoic acid	124-07-2	H314;	4.39 ± 4.67 (16.28 ± 22.04)	4.92 ± 6.74 (18.44 ± 26.98)	0.06 ± 0.05 (17.25 ± 11.6)
Riboflavin	83-88-5	N/A	28.21 ± 26.21 (12.79 ± 4.58)	2.38 ± 3.17 (-3.38 ± 3.06)	49.01 ± 23.03 (13.5 ± 12.9)
Isoeugenol	97-54-1	H312;H315;H317;H319;	10.46 ± 6.54 (12.17 ± 8.23)	4.18 ± 7.21 (17.93 ± 9.63)	29.91 ± 36.7 (7.85 ± 7.22)
7-Hydroxy-3,7-dimethyloctanal	107-75-5	H317;H319;
N-Phenyl-1,4-benzenediamine	101-54-2	H312;H315;H317;H319;	0.06 ± 0.04 (1.33 ± 10.07)	22.19 ± 31.37 (3 ± 24.14)	0.01 ± 0.02 (10.5 ± 12.13)	0.01 ± 0 (14.32 ± 8.38)
Farnesol	4602-84-0	H315;H317;H319;	3.75 ± 6.41 (34.49 ± 16.84)	0.26 ± 0.34 (16.83 ± 16.55)	33.1 ± 41.83 (-4.03 ± 17.63)	1.57 ± 2.22 (11.93 ± 12.62)
1-(4-Methoxyphenyl)-1-pentene-3-one	104-27-8	H317;	27.65 ± 16.83 (7.46 ± 6.48)	0.06 ± 0.06 (4.45 ± 3.86)
4-Chloroaniline	106-47-8	H310;H311;H317;		0.06 ± 0.06 (-3.68 ± 3.18)
Octadecanoic acid, monoester with 1,2-propanediol	1323-39-3	N/A		0.63 ± 0.88 (5.9 ± 5.12)	0.1 ± 0.14 (-11.07 ± 26.18)	6.36 ± 8.69 (-9 ± 8.07)
Biotin	58-85-5	N/A				57.49 ± 27 (15.94 ± 4.49)
Glyoxal	107-22-2	H315;H317;H318;H319;
Ethylene glycol dimethacrylate	97-90-5	H315;H317;H319;		0.57 ± 0.78 (13.57 ± 11.94)		31.62 ± 5.13 (-2.94 ± 22.47)
alpha-Lipoic acid	1077-28-7	H315;H319;			41.6 ± 30.79 (27.02 ± 3.84)	27.55 ± 6.69 (-10.63 ± 4.05)
Nerolidol	7212-44-4	H315;H319;	1.12 ± 0.24 (12.1 ± 4.57)	0.5 ± 0.55 (21.39 ± 3.57)	0.76 ± 1.06 (17.55 ± 6.57)	0.34 ± 0.56 (18.89 ± 10.56)
Cysteamine hydrochloride	156-57-0	H315;H319;	7.86 ± 10.58 (7.76 ± 26.73)	13.76 ± 2.23 (21.91 ± 21.01)
2-Phenoxyethanol	122-99-6	H319;		0.99 ± 0 (8.91 ± 10.03)	22.16 ± 14.69 (16.02 ± 3.99)	20.08 ± 18.1 (24.59 ± 8.18)
Salicylic acid	69-72-7	H312;H315;H317;H318;H319;	43.64 ± 17.29 (7.9 ± 28.78)	39.03 ± 45.01 (8.64 ± 31.12)		0.01 ± 0.01 (5.5 ± 4.92)
Isopropyl acetate	108-21-4	H319;	15.75 ± 21.88 (13.3 ± 11.8)	12.46 ± 10.75 (14.53 ± 3.72)	0.56 ± 0.77 (7.91 ± 7.15)	0.15 ± 0.21 (17.5 ± 9.65)
Aluminum monostearate	7047-84-9	N/A	5.17 ± 8.81 (16.41 ± 12.06)	0.25 ± 0.33 (3.21 ± 10.55)
Hexanedioic acid	124-04-9	H319;	2.97 ± 3.7 (7.84 ± 7.79)	0.1 ± 0.13 (-3.04 ± 10.77)	26.14 ± 33.44 (9.86 ± 9.36)	0.42 ± 0.29 (9.54 ± 8.27)
Gluconolactone	90-80-2	H319;		12.16 ± 17.19 (10.62 ± 11.77)	8.16 ± 0.66 (11.3 ± 10.04)	16.24 ± 3.66 (24.94 ± 8.58)
2,2',2'',2'''-(1,2-Ethanediyldinitrilo)tetrakisethanol	140-07-8	H315;H318;	17.12 ± 15.82 (-22.45 ± 13.34)	23.97 ± 10.08 (-23.91 ± 6.47)
Citral	5392-40-5	H315;H317;H319;	1.26 ± 0.2 (10.86 ± 11.47)	1.78 ± 1.01 (8.07 ± 1.43)	4 ± 1.84 (16.65 ± 5.13)	3.11 ± 2.15 (12.95 ± 0.87)
Bromcresol green	76-60-8	H315;H319;		45.69 ± 3.72 (-14.26 ± 12.79)	10.93 ± 15.07 (-15.88 ± 17.07)	0.68 ± 0.96 (-3.17 ± 18.44)
10-undecena	112-45-8	H315;H317;H319;	4.44 ± 7 (-23.29 ± 12.61)		0.33 ± 0.28 (-24.45 ± 14.31)	0 ± 0 (-19.2 ± 1.75)
Sodium dehydroacetate	4418-26-2	N/A	0.05 ± 0.05 (12.85 ± 12.52)		4.65 ± 4.59 (25.03 ± 21.82)	9.08 ± 12.14 (16.1 ± 16.34)
Mmthylmethane sulfonate	151-21-3	H315;H319;		0.01 ± 0 (19.81 ± 4.08)	14.02 ± 12.2 (23.35 ± 5.28)	3.64 ± 0.3 (7.03 ± 6.09)
FD&C Red 3	16423-68-0	N/A	27.25 ± 37.57 (-6.52 ± 5.68)	27.98 ± 36.54 (6.76 ± 6.52)		21.42 ± 0 (-5.97 ± 5.56)
Ethylene glycol	107-21-1	H315;H320;	9.98 ± 14.09 (11.3 ± 11.13)
Sodium D-gluconate	527-07-1	N/A	19.65 ± 8.43 (17.52 ± 11.26)	1.12 ± 1.57 (-0.07 ± 10.9)	8.91 ± 13.89 (16.75 ± 3.77)	2.01 ± 2.11 (0.44 ± 23.56)
Imidazolidinyl urea	39236-46-9	H317;H319;			0.07 ± 0.08 (-11.83 ± 10.26)	0 ± 0 (-24.6 ± 2.23)
Manninotriose	13382-86-0	N/A			2.39 ± 0.95 (-9.5 ± 8.51)	11.15 ± 3.57 (-7.45 ± 6.46)
Thioglycolic acid	68-11-1	H311;H315;H317;H318;H319;	0.33 ± 0.48 (18.41 ± 6)	0.4 ± 0.54 (10.27 ± 10.97)	1.05 ± 0.49 (21.78 ± 7.35)	0.75 ± 0.64 (18.81 ± 3.7)
Styrene	100-42-5	H315;H319;	0.25 ± 0.13 (-7.59 ± 6.91)	0.34 ± 0.21 (-8.8 ± 7.63)
Methyl styryl acetone	7212-44-4	H315;H317;H319;	6.09 ± 8.62 (0.09 ± 16.41)	1.22 ± 1.2 (15.98 ± 3.89)	9.28 ± 2.24 (15.09 ± 14.12)	0 ± 0 (-18.6 ± 1.4)
SACCHARIN	156-57-0	H312;	18.46 ± 16.33 (-17.17 ± 24.06)	22.91 ± 19.82 (-7.95 ± 2.83)	3.69 ± 0.89 (11.65 ± 10.09)	4.59 ± 0.37 (10.36 ± 8.97)
3,3,5-Trimethylcyclohexyl salicylate	118-56-9	H315;H319;	41.2 ± 50.94 (1.05 ± 14.75)		0.45 ± 0.62 (-25.55 ± 37.54)	0.01 ± 0 (8.4 ± 8.88)
Clofibrate	637-07-0	H315;H318;	4.97 ± 7.02 (-15.39 ± 14.24)	29.52 ± 51.11 (9.96 ± 3.56)	0.32 ± 0.44 (-7.22 ± 6.55)	0.01 ± 0 (-17.89 ± 2.75)
Phenyl benzoate	93-99-2	H315;H317;	0.11 ± 0.15 (-0.04 ± 6.25)			4.77 ± 1.15 (-4.81 ± 4.17)
Phenol	108-95-2	H311;H314;	1.99 ± 2.81 (-2.15 ± 18.98)			0 ± 0 (11.17 ± 2.25)
Benzyl cinnamate	103-41-3	H317;	0.04 ± 0.02 (12.57 ± 1.1)		3.53 ± 3.05 (14.01 ± 3.31)	0.06 ± 0.01 (11.56 ± 1.22)
2-[2-(2-Butoxyethoxy)ethoxy]ethanol	143-22-6	H318;H319;		0.21 ± 0.28 (12.63 ± 13.41)	0.03 ± 0.02 (36.89 ± 1.66)	4.29 ± 7.41 (25.79 ± 11.97)
tetraethylenepentamine	90-80-2	H315;H319;		0.01 ± 0 (13.08 ± 11.48)		0.39 ± 0.37 (19.35 ± 3.96)
1-Tetradecanol	112-72-1	H315;			0.36 ± 0.12 (-12.43 ± 17)	4.06 ± 1.3 (-6.87 ± 5.99)
Estragole	141-27-5	H317;
2,6-Dimethyloctan-2-ol	18479-57-7	H315;H319;	0.33 ± 0.03 (-28.86 ± 62.74)	0.27 ± 0.14 (-49.88 ± 62.5)	12.66 ± 16.4 (15.65 ± 2.24)	3.37 ± 1.51 (19.48 ± 7.92)
Dimethylaminoethanol	108-01-0	H312;H314;H317;H318;	0.46 ± 0.69 (19.01 ± 19.66)		0.71 ± 0.36 (17.22 ± 3.94)	0.79 ± 0.54 (17.27 ± 0.56)
C.I. Acid Orange 24, monosodium salt	1320-07-6	N/A	4.74 ± 5.82 (7.35 ± 8.7)		3.9 ± 4.5 (20.69 ± 6)	0.03 ± 0.02 (22.33 ± 5.61)
1-(Hydroxymethyl)-5,5-dimethylhydantoin	116-25-6	H315;H317;H319;	0.12 ± 0.12 (16.85 ± 9.6)		0.54 ± 0.49 (12.55 ± 10.89)	0.53 ± 0.36 (12.68 ± 11.03)
dl-alpha-Tocopheryl acetate	52225-20-4	H315;H317;H319;
4-Ethoxy-4-oxobut-2-enoic acid	3249-53-4	H315;H319;	15.78 ± 22.11 (2.79 ± 11.47)
Cobalt sulfate heptahydrate	10026-24-1	H315;H317;H319;	19.34 ± 21.23 (-10.01 ± 10.24)	17.02 ± 19.22 (-6.12 ± 5.49)	13.68 ± 19.24 (-0.98 ± 5.53)	13.25 ± 9.64 (-15.47 ± 4.33)
1-Monolaurin	142-18-7	H319;	30.95 ± 24.3 (28.36 ± 8.48)	1.16 ± 1.11 (13 ± 4.59)	0.94 ± 0.44 (4.9 ± 4.84)	10.38 ± 15.26 (13.75 ± 2.01)
3-Methyl-5-phenylpentan-1-ol	55066-48-3	H318;	3.54 ± 3.19 (-23.89 ± 8.98)	8.79 ± 9.7 (-26.9 ± 14.64)		24.98 ± 27.43 (-9.22 ± 9.15)
Nitrilotriacetic acid	139-13-9	H315;H319;	1 ± 1.31 (22.13 ± 9.9)		3.37 ± 4.08 (27.12 ± 10.24)	4.92 ± 4.07 (28.77 ± 10.72)
Pyridine	122-57-6	H312;	1.03 ± 1.76 (3.82 ± 9.51)	7 ± 3.79 (-5.82 ± 5.3)		12.57 ± 12.77 (-9.17 ± 2.93)
N-(2-Hydroxyethyl)acetamide	142-26-7	H315;H318;		5.91 ± 10.18 (15.13 ± 5.09)
5-Chloro-2-methyl-3(2H)-isothiazolone	26172-55-4	H314;H317;	0.53 ± 0.62 (-3.82 ± 49.94)	1.17 ± 0.28 (-23.5 ± 31.43)		0.04 ± 0.01 (9.38 ± 0.52)
2-(2-Butoxyethoxy)ethanol	112-34-5	H319;				7.79 ± 4.74 (-8.39 ± 7.35)
Isoeugenol	97-54-1	H312;H315;H317;H319;		0.1 ± 0.14 (-7.95 ± 9.59)
Lactose	63-42-3	H320;		6.23 ± 3.11 (-4.54 ± 18.15)		0.02 ± 0.01 (6.83 ± 5.92)
beta-Citronellol	103-41-3	H315;H317;H319;	6.88 ± 9.11 (4.41 ± 15.97)	0.77 ± 1.08 (7.83 ± 6.79)
Tricaprylin	538-23-8	N/A			0.22 ± 0.31 (5.11 ± 12.45)
2-Vinyl pyridine	112-57-2	H311;H314;H315;H317;H318;H319;			0.51 ± 0.04 (8.81 ± 8.11)	0.25 ± 0.24 (25.76 ± 7.34)
5,5-Dimethylhydantoin	77-71-4	H315;H319;	8.04 ± 11.02 (-4.74 ± 4.33)
4-Chloro-3,5-dimethylphenol	88-04-0	H315;H317;H319;	0.82 ± 1.07 (11.86 ± 14.26)	7.93 ± 10.49 (11.62 ± 16.8)	0.62 ± 0.38 (11.15 ± 11.48)	1.35 ± 0.44 (11.37 ± 0.82)
valeryl chloride; pentanoyl chloride	18479-57-7	H314;H318;	0.35 ± 0.48 (9.28 ± 8.07)	0.24 ± 0.34 (8.42 ± 7.3)	0.67 ± 0.75 (9.12 ± 1.24)	3.2 ± 3.17 (12.6 ± 2.33)
1-Methoxy-2-propanol	107-98-2	H320;	10.01 ± 14.04 (-12.67 ± 17.31)	0.23 ± 0.3 (-10.62 ± 11.7)
C.I.Acid orange 24	1320-07-6	N/A	5.66 ± 5.93 (18.75 ± 0.23)	1.33 ± 0.62 (10.46 ± 9.49)		0.29 ± 0.08 (14.8 ± 2.41)
boron trifluoride dihydrate	116-25-6	H314;	0.66 ± 0.93 (23.49 ± 6.06)	1.57 ± 2.02 (15.26 ± 4.63)	0.37 ± 0.27 (19.23 ± 2.92)	0.14 ± 0.15 (35.86 ± 6.77)
1-Hexadecanol	26172-55-4	H315;H319;				21.02 ± 26.2 (11.13 ± 11.13)
1,1'-Oxybis-2-propanol	110-98-5	H315;H319;		0.01 ± 0 (-3.19 ± 17.51)
2-Propyl-1-heptanol	10042-59-8	H315;H318;H319;	2.39 ± 0.58 (13.89 ± 2.55)		3.03 ± 1.72 (21.85 ± 3.44)	3.82 ± 3.53 (20.34 ± 1.49)
Benzyl acetate	140-11-4	H315;H319;	15.71 ± 22.21 (0.1 ± 10.82)
Silica	7631-86-9	H315;H317;H318;H319;H320;				7.03 ± 0 (-5.17 ± 4.49)
Dibutyl hexanedioate	105-99-7	N/A				0.02 ± 0 (13.53 ± 11.73)
Allantoin	97-59-6	N/A
1-Ethyl-2-pyrrolidinone	2687-91-4	H318;H319;		0.28 ± 0.39 (6.48 ± 5.83)	12.78 ± 6.91 (11.01 ± 9.56)	26.2 ± 4.71 (19.58 ± 0.12)
Dimethyl glutarate	1119-40-0	H315;H319;	3.52 ± 4.97 (-8.33 ± 8.5)			14.79 ± 25.62 (5.41 ± 14.25)
p-Amino benzenesulfonic acid	26172-55-4	H315;H317;H319;	2.16 ± 3.06 (-3.15 ± 13.55)
m-Xylene	112-34-5	H312;H315;			2.82 ± 0.91 (11.41 ± 1.3)	2.68 ± 0.65 (14.96 ± 0.84)
3,4-Diaminotoluene	97-54-1	H312;H315;H317;H319;				0.19 ± 0.14 (11.02 ± 2.79)
4-Hydroxyindole	2380-94-1	H315;H319;		21.77 ± 30.36 (8.37 ± 9.7)	20.76 ± 5.02 (9.4 ± 8.15)	8.26 ± 5.56 (10.09 ± 8.74)
Butylated hydroxytoluene	128-37-0	H315;H319;	0.26 ± 0.34 (-1.18 ± 18.12)			25.12 ± 4.07 (-10.88 ± 11.93)
Diethylenetriamine	111-40-0	H312;H317;	8.21 ± 10.08 (-8.27 ± 45.67)	8.53 ± 9.63 (-10.06 ± 50.68)	21.62 ± 30.57 (1.3 ± 15.79)	33.78 ± 13.38 (-8.4 ± 7.63)
(2E)-2-Hexenal	6728-26-3	H311;H317;H319;	1.18 ± 2.02 (24.79 ± 10.27)	11.93 ± 11.98 (3.76 ± 11.4)	0.01 ± 0 (27.5 ± 4.22)	0.01 ± 0 (26.68 ± 5.48)
Ubidecarenone	303-98-0	N/A
3-(4-tert-Butylphenyl)-2-methylpropanal	80-54-6	H315;H317;	22.38 ± 31.1 (7.67 ± 8.62)		5.89 ± 10.2 (19.2 ± 1.22)
Citronellal	106-23-0	H315;H317;H319;	0.03 ± 0 (5.42 ± 4.7)
Sorbitan, mono-(9Z)-9-octadecenoate	1338-43-8	H315;H319;	0.74 ± 0.55 (13.81 ± 7.98)	1.12 ± 0.18 (8.14 ± 7.73)	3.85 ± 2.49 (15.83 ± 5.67)	0.15 ± 0.07 (14.92 ± 2.97)
Sodium hypochlorite	7681-52-9	N/A		24.26 ± 34.3 (-7.73 ± 6.79)		12.17 ± 17.17 (-5.08 ± 5.59)
5-Amino-2-methylphenol	2835-95-2	H315;H317;H319;H320;		1.41 ± 1.97 (13.28 ± 12.09)	0.19 ± 0.01 (17.09 ± 4.38)
Isodecyl acrylate	1330-61-6	H315;H317;H319;		0.09 ± 0.16 (10.49 ± 1.78)
Pentylcinnamaldehyde	122-40-7	H315;H317;	1.82 ± 3.14 (29.35 ± 16.88)	6.84 ± 9.67 (21.34 ± 26.49)	2.59 ± 4.41 (40.04 ± 12.01)
MGK-264	113-48-4	H311;	6.63 ± 9.62 (28.36 ± 1.62)	1.45 ± 0.69 (15.78 ± 11.99)	0 ± 0 (23.42 ± 3.85)	0.01 ± 0 (21.37 ± 7.73)
1,2-Propylene glycol	57-55-6	H312;H315;H318;H319;	1.48 ± 2.07 (10.19 ± 4.33)	6.55 ± 11.06 (14.71 ± 9.57)
N-Methyl-2-pyrrolidone	872-50-4	H315;H319;
Nonanoic acid	112-05-0	H314;H315;H318;H319;		32.14 ± 49 (8.06 ± 18.89)	9.39 ± 0.76 (-11.03 ± 12.45)
2,6-Diaminopyridine	141-86-6	H312;H315;H317;H319;	0.15 ± 0.18 (3.65 ± 10.47)	0.15 ± 0.18 (19.51 ± 28.29)	1.71 ± 2.02 (6.02 ± 5.47)	0.07 ± 0.06 (11.09 ± 10.79)
Dimethyl succinate	106-65-0	H319;H320;		0.07 ± 0.02 (5.34 ± 4.65)		27.53 ± 10.91 (9.42 ± 8.35)
10-Undecenoic acid	112-38-9	H315;H319;				25.17 ± 34.81 (0.75 ± 9.89)
3,4-Dihydrocoumarin	121-57-3	H317;	29.1 ± 27.46 (-2.47 ± 31.59)	9.15 ± 0.74 (-18.91 ± 16.8)		3.85 ± 5.43 (-1.54 ± 8.89)
Edaravone	89-25-8	N/A	5.18 ± 7.36 (29.59 ± 12.18)		4.08 ± 7.02 (31.28 ± 5.44)	0.1 ± 0.01 (6.59 ± 5.71)
2-Methoxy-4-propylphenol	2785-87-7	H317;H319;	0.01 ± 0 (9.1 ± 0.85)
Canthaxanthin	514-78-3	N/A	1.35 ± 0.82 (-6.8 ± 5.9)		0.04 ± 0.05 (5.41 ± 6.15)	0 ± 0 (9.36 ± 3.08)
1,4-Benzenediamine	106-50-3	H311;H317;H319;			23.91 ± 9.47 (10.23 ± 8.9)	9.1 ± 15.75 (20.01 ± 2.34)
1-(2,3,8,8-Tetramethyl-1,2,3,4,5,6,7,8-octahydronaphthalen-2-yl)ethanone	54464-57-2	H315;H317;	0.22 ± 0.04 (9.13 ± 8.85)	26.17 ± 32.57 (13.08 ± 8.58)	0.19 ± 0.32 (15.08 ± 5.09)	0.01 ± 0 (24.02 ± 3.49)
3-Phenylprop-2-en-1-yl acetate	103-54-8	H317;H319;				17.67 ± 0 (-8.47 ± 7.44)
Diethylene glycol	111-46-6	N/A	2.58 ± 0.82 (-19.97 ± 23.96)	16.92 ± 20.76 (-3.1 ± 35.58)	0 ± 0 (18.05 ± 15.64)	0 ± 0 (13.52 ± 12.29)
1-Naphthol	90-15-3	H312;H315;H318;	0.17 ± 0.2 (-1.76 ± 16.07)	1.07 ± 1.79 (4.14 ± 12.54)	56.23 ± 9.12 (-15.8 ± 13.97)	3.53 ± 4.95 (12.65 ± 11.89)
Tripropylene glycol diacrylate	42978-66-5	H315;H317;H319;	6.72 ± 11.34 (10.75 ± 4.72)	35.56 ± 20.14 (-23.99 ± 8.8)	32.34 ± 9.01 (19.17 ± 3.75)	52.83 ± 4.3 (-9.67 ± 8.98)
Diethyl phthalate	1338-43-8	H315;H317;H319;H320;		0.62 ± 0.85 (-0.44 ± 11.35)	3.86 ± 5.41 (-5.26 ± 18.21)	0.04 ± 0 (7.06 ± 6.37)
alpha-Isomethylionone	127-51-5	H315;H317;H319;	3.31 ± 4.18 (9.5 ± 9.6)	2.56 ± 0.82 (10.22 ± 9.87)	5.75 ± 1.6 (19.54 ± 11.59)	5.26 ± 4.55 (15.76 ± 10.66)
2-Mercaptobenzothiazole	149-30-4	H317;	13.7 ± 19.21 (-9.39 ± 10.85)			0.19 ± 0.27 (-8.14 ± 8.26)
Diethylene glycol monomethyl ether	111-77-3	H312;H319;	15.71 ± 22.21 (2.15 ± 16.55)	0.06 ± 0.1 (11.89 ± 7.09)
Eosin	17372-87-1	H319;		28.29 ± 48.97 (-4.48 ± 14.52)	5.44 ± 4.31 (-4.37 ± 3.95)
Butyl glycidyl ether	2426-08-6	H311;H315;H317;H319;H320;	4.44 ± 6.24 (-12.12 ± 31.74)	9.93 ± 0 (-29.54 ± 25.61)
Coumarin	91-64-5	H317;				0.87 ± 1.2 (0.5 ± 7.26)
Catechol	120-80-9	H312;H315;H319;		0.34 ± 0.57 (3.61 ± 10.93)	7.94 ± 0 (9.71 ± 8.45)	4.1 ± 4.21 (8.11 ± 7.68)
Geraniol	106-24-1	H315;H317;H318;
D-Camphor	464-49-3	H312;H315;H317;H319;H320;	1.76 ± 1.34 (18.64 ± 7.45)	1.35 ± 1.62 (8.24 ± 7.52)	3.2 ± 2.56 (17.18 ± 2.67)	2.48 ± 1.24 (16.84 ± 2.68)
DEET	134-62-3	H315;H319;	8.61 ± 12.17 (14.87 ± 16.71)		4.32 ± 6.1 (-0.41 ± 11.62)
1,3-Propanediol	504-63-2	H315;	0.93 ± 1.35 (3.8 ± 11.11)
Octinoxate	5466-77-3	H315;				24.28 ± 34.28 (-6.18 ± 6.02)
Adenosine triphosphate	56-65-5	H311;H315;H319;		0.03 ± 0.04 (8.42 ± 7.29)	0.03 ± 0.03 (7.87 ± 2.63)	0.03 ± 0.01 (6.25 ± 6.24)
Acrylic acid	79-10-7	H312;H314;	14.07 ± 18.68 (-21.63 ± 19.68)	0.5 ± 0.51 (-16.13 ± 19.16)	21.33 ± 24.74 (-14.07 ± 2.97)
3-Ethoxy-4-hydroxybenzaldehyde	121-32-4	H315;H319;	5.14 ± 6.78 (2.57 ± 12.68)			56.23 ± 9.12 (-9.03 ± 8.04)
Eugenol	97-53-0	H315;H317;H319;	6.31 ± 8.76 (-6.56 ± 5.69)
Acetic acid	64-19-7	H314;	3.61 ± 3.71 (6.98 ± 6.08)	6.13 ± 2.43 (-6.37 ± 6.31)		0 ± 0 (10.92 ± 9.78)
Alizarin	72-48-0	H315;H319;	27.46 ± 4.45 (-20.04 ± 18.42)	0.72 ± 1.25 (-15.72 ± 8.54)	27.4 ± 22.9 (-15.11 ± 22.64)
all-trans-Retinoic acid	302-79-4	H315;H319;	16.61 ± 28.74 (-1.02 ± 33.05)	17.65 ± 24.88 (7.16 ± 7.62)	11.1 ± 14.64 (18 ± 10.03)	9.28 ± 11.22 (14.6 ± 2.04)
1,2-Phenylenediamine	95-54-5	H312;H317;H319;	44.6 ± 62.88 (10.35 ± 9.1)			0.04 ± 0 (14.74 ± 2.56)
Isocetyl stearate	25339-09-7	N/A	36.6 ± 51.18 (14.88 ± 18.31)	3.78 ± 4.66 (-20.98 ± 24.49)	10.5 ± 9.42 (15.53 ± 1.44)	0.08 ± 0.01 (4.22 ± 3.74)
Benzyl salicylate	118-58-1	H317;H319;	1.6 ± 1.7 (16.1 ± 6.31)	0.13 ± 0.03 (19.85 ± 3.84)	3.57 ± 3.99 (18.14 ± 13.62)	24.9 ± 35.2 (4.62 ± 16.9)
FD&C Red 4	4548-53-2	N/A		0.18 ± 0.25 (6.6 ± 8.07)	0.69 ± 0.62 (19.56 ± 1.56)	0.05 ± 0.03 (34.21 ± 3.67)
C.I. Acid Red 1	3734-67-6	H315;H317;H319;	0.66 ± 1.14 (7.4 ± 25.75)	88.54 ± 0 (-23.91 ± 20.87)		49.24 ± 13.72 (-13.39 ± 4.95)
Curcumin	458-37-7	N/A		0.01 ± 0.01 (9.08 ± 9.37)
4-Nitro-1,2-phenylenediamine	99-56-9	H312;H317;		2.53 ± 3.46 (0.67 ± 4.74)
Propylene carbonate	108-32-7	H319;	44.41 ± 62.41 (-13.94 ± 15.73)
Linalyl acetate	115-95-7	H315;H319;		0.12 ± 0.05 (7.21 ± 6.96)	2.43 ± 2.82 (21 ± 7.77)	8.91 ± 1.44 (10.22 ± 9.16)
o-Aminophenol	95-55-6	H312;H315;H319;	43.64 ± 17.29 (-15.43 ± 13.78)	52.7 ± 11.89 (-26.49 ± 12.56)		88.54 ± 0 (-16.55 ± 7.77)
Geraniol	106-24-1	H315;H317;H318;	0.14 ± 0.08 (22.2 ± 8.83)	0.02 ± 0.01 (16.36 ± 1.49)	7.89 ± 6.84 (23.05 ± 10.95)	11.19 ± 15.63 (9.04 ± 7.83)
Pentane	109-66-0	H312;H315;H319;H320;	0.14 ± 0.07 (13.16 ± 4.83)	2.33 ± 3.92 (16.88 ± 3.86)		0.61 ± 0.51 (8.6 ± 8.21)
2-Methoxy-4-methylphenol	93-51-6	H315;H317;H319;			0.02 ± 0.03 (0.05 ± 11.08)	4.97 ± 7.02 (1.79 ± 7.84)
(S)-4-Isopropenyl-1-cyclohexene-1-carboxaldehyde	18031-40-8	H315;H319;	0.31 ± 0.44 (0.19 ± 10.12)		31.54 ± 44.04 (-5.95 ± 5.92)	59.58 ± 56.23 (-8.79 ± 8.07)
Benzyl alcohol	100-51-6	H312;H315;				12.16 ± 2.07 (-12.26 ± 5.56)
C.I. Acid Yellow 3 disodium salt	8004-92-0	N/A
N-Octyl-2-pyrrolidone	2687-94-7	H314;H318;				0.01 ± 0 (7.74 ± 1.33)
Dipropylene glycol	25265-71-8	N/A	9.52 ± 2.3 (-11.32 ± 9.8)	10.14 ± 6.17 (-18.88 ± 8.85)
Veratraldehyde	120-14-9	H315;H317;H319;
trans-Squalene	111-02-4	N/A	3.26 ± 5.56 (8.94 ± 4.8)		3.69 ± 4.45 (17.43 ± 7.13)	11.76 ± 7.88 (13.43 ± 6.23)
Diethanolamine	111-42-2	H314;H315;H317;H318;H319;	0.08 ± 0.08 (15.58 ± 13.5)	0.02 ± 0.02 (14.78 ± 0.81)	0.44 ± 0.62 (11.61 ± 11.17)	8.26 ± 8.16 (9.21 ± 8.51)
Isopropanol	67-63-0	H319;		0.02 ± 0.03 (10.42 ± 10.14)		24.7 ± 19.57 (-5.11 ± 16)
m-Aminophenol	93-51-6	H317;	0.78 ± 1.07 (34.03 ± 4.34)	0 ± 0 (15.11 ± 5.34)	9.1 ± 15.75 (19.78 ± 1.73)	6.47 ± 11.12 (17.21 ± 7.17)
3-Phenyl-2-propen-1-ol	104-54-1	H317;H319;
L-Ascorbic acid	50-81-7	H315;H319;	10.47 ± 13.23 (10.97 ± 11.89)	22.23 ± 31.32 (10.67 ± 9.29)		0.23 ± 0.15 (11.71 ± 3.05)
Esculin	531-75-9	N/A	3.74 ± 5.1 (-25.79 ± 22.34)		4.91 ± 8.45 (-9.83 ± 2.85)
Butyl acrylate	141-32-2	H312;H315;H317;H319;	1.62 ± 2.29 (2.27 ± 7.74)	0.21 ± 0.29 (5.52 ± 15.74)
Decamethylcyclopentasiloxane	541-02-6	H315;H319;	55.39 ± 46.88 (14.48 ± 13.11)		13.19 ± 22.83 (12.67 ± 4.27)	0 ± 0 (6.73 ± 6.6)
4-Amino-2-nitrophenol	119-34-6	H315;H318;		0.49 ± 0.79 (-8.33 ± 2.66)	22.14 ± 21.17 (-24.45 ± 8.51)	99.34 ± 0 (-7.72 ± 6.83)
2-Methyl-5-nitrobenzenesulfonic acid	121-03-9	H314;H315;H317;H318;				13.57 ± 12.61 (-8.12 ± 14.1)
Malic acid	6915-15-7	H315;H318;		0.04 ± 0.05 (13.17 ± 6)	0.27 ± 0.23 (12.13 ± 2.95)	6.61 ± 11.44 (24.94 ± 3.77)
Benzocaine	94-09-7	H317;				10.86 ± 0 (-13.25 ± 1.92)
Dodecyl 2-methylacrylate	142-90-5	H315;H319;				41.96 ± 3.41 (14.6 ± 12.66)
Terpineol	8000-41-7	H315;H319;		0 ± 0 (10.73 ± 9.82)	1.03 ± 0.99 (20.38 ± 10.97)
6-Methyl coumarin	92-48-8	H319;	4.98 ± 7.01 (5.01 ± 4.64)
2-Amino-5-nitrophenol	121-88-0	H315;H319;	0.08 ± 0.05 (32.83 ± 12.07)	0.01 ± 0 (14.84 ± 13.46)	23.86 ± 33.91 (17.71 ± 7.95)	0.04 ± 0.04 (15.06 ± 2.58)
1,2-Propylene glycol	57-55-6	H312;H315;H318;H319;			25.55 ± 26.25 (9.47 ± 8.86)	3.99 ± 3.57 (15.69 ± 4.91)
Prop-2-en-1-yl heptanoate	142-19-8	H311;H312;H315;H319;	14.2 ± 19.52 (6.74 ± 18.19)	0.01 ± 0.01 (-1.5 ± 13.31)
alpha-Terpinyl acetate	80-26-2	N/A	2.68 ± 0.65 (-10.67 ± 27.22)
Glucosamine hydrochloride	66-84-2	N/A	1.53 ± 2.16 (-12.5 ± 11.58)	2.3 ± 1.08 (-10.9 ± 10.48)		3.06 ± 0 (-8.51 ± 7.48)
2,4-Dimethylcyclohex-3-ene-1-carbaldehyde	68039-49-6	H315;H317;H319;		3.76 ± 3.55 (-4.25 ± 3.69)		18.2 ± 18.69 (-5 ± 4.36)
3,4-Dichloroaniline	95-76-1	H311;H317;H318;	12.5 ± 10.87 (21.5 ± 6.46)	0.46 ± 0.6 (-3.45 ± 3.24)		2.78 ± 1.19 (-5.34 ± 1.51)
Pyrogallol	87-66-1	H312;H315;H317;H319;	10.21 ± 12.43 (19.55 ± 5.44)	1.72 ± 2.43 (-6.5 ± 6.72)	26.98 ± 30.46 (0.04 ± 13.94)	9.6 ± 8.12 (-8.97 ± 7.78)
1-Butanol	71-36-3	H315;H319;	25.43 ± 37.52 (-17.58 ± 24.82)	5.28 ± 4.73 (-2.02 ± 9.58)
C.I. Acid Blue 74	860-22-0	N/A		7 ± 5.18 (-15.21 ± 10.29)
2-Hydroxy-4-methoxybenzophenone	131-57-7	H315;H317;H319;		1.43 ± 1.94 (-7.49 ± 7.04)	0.04 ± 0.01 (6.47 ± 0.62)	0.04 ± 0.01 (4.44 ± 4.11)
Phosphoric acid	7664-38-2	H314;			2.86 ± 2.27 (3.68 ± 3.37)
1,3-Benzenediamine	108-45-2	H311;H317;H319;	13.44 ± 16.13 (-21.99 ± 66.84)	22.82 ± 30.86 (1.5 ± 11.21)		5.69 ± 7.82 (-8.5 ± 9.99)
Ethyl acetate	141-78-6	H319;	15.33 ± 24.21 (27.12 ± 45.85)
Hexadecanoic acid	57-10-3	H319;				29.2 ± 21.45 (-7.83 ± 8.81)
Methyl styryl ketone	122-57-6	H315;H317;H319;			15.25 ± 18.03 (8.42 ± 9.68)
4-(methylthio)benzaldehyde	131-57-7	H311;H315;H319;	0 ± 0 (21.9 ± 6.08)	1.22 ± 1.72 (12.28 ± 15.4)	0.01 ± 0 (15.21 ± 3.64)	0.01 ± 0 (13.65 ± 11.84)
(2E)-3,7-Dimethylocta-2,6-dien-1-yl formate	105-86-2	H317;	0.07 ± 0.03 (5.95 ± 5.42)	3.16 ± 0.51 (-7.25 ± 7.05)		0.1 ± 0.02 (4.82 ± 4.17)
Oxalic acid	144-62-7	H312;H314;H315;H318;	4.49 ± 0.73 (-8.35 ± 7.44)			29.96 ± 26.44 (5.91 ± 18.49)
3,7-Dimethyloctan-1-ol	106-21-8	H315;H319;	31.14 ± 49.75 (9.67 ± 17.88)		4.97 ± 7.02 (22.06 ± 21.05)	10.97 ± 6.84 (18.41 ± 2.77)
3,7-Dimethyl-3-octanol	78-69-3	H315;H319;	6.62 ± 11.43 (-2.72 ± 14.12)
Phenethyl bromide	122-57-6	H315;H319;	10.84 ± 15.32 (21.32 ± 0.24)	4.89 ± 6.78 (12.22 ± 10.61)	5.26 ± 8.74 (19.26 ± 10.74)	5.79 ± 9.89 (17.07 ± 4.47)
Estragole	140-67-0	H317;	0.01 ± 0.01 (12.61 ± 5.64)			0.01 ± 0 (5.61 ± 4.94)
phosphorus pentachloride	7775-27-1	H312;H314;H318;	0.7 ± 0.95 (14.43 ± 1.76)	0.02 ± 0.02 (7.06 ± 1.01)	2.65 ± 4.37 (27.24 ± 7.17)	0.04 ± 0.03 (14.34 ± 12.87)
Linalool	78-70-6	H315;H319;	0 ± 0 (20.65 ± 4.28)	1.2 ± 1.25 (-0.82 ± 8.95)		18.87 ± 23.16 (-5.63 ± 5.45)
Triethoxyoctylsilane	2943-75-1	H315;H319;				37.89 ± 9.16 (-9.63 ± 8.34)
DEET	134-62-3	H315;H319;		2.24 ± 0.36 (6.27 ± 6.11)	1.68 ± 0.5 (15.12 ± 1.37)	4.32 ± 3.4 (16.37 ± 1.03)
Lactic acid	50-21-5	H314;H315;H318;				0.03 ± 0.03 (11.25 ± 7.61)
N,N-Dimethyldodecan-1-amine	112-18-5	H314;H318;
Hyaluronic acid	9004-61-9	N/A	3.38 ± 3.92 (15.79 ± 5.46)	3.05 ± 4.32 (-6.32 ± 5.78)	0.32 ± 0.47 (10.01 ± 3.69)	0.03 ± 0.01 (13.69 ± 0.53)
L-Arginine	74-79-3	H319;		0.18 ± 0.1 (5.86 ± 6.04)		3.64 ± 0.3 (12.36 ± 0.68)
(4-Methoxyphenyl)methanol	105-13-5	H317;H318;			21.08 ± 18.61 (21.79 ± 8.56)	13.19 ± 22.83 (27.76 ± 4.56)
Fumaric acid	110-17-8	H319;	1.67 ± 1.58 (11.15 ± 9.97)	0.25 ± 0.27 (7.03 ± 7.04)	2.19 ± 0.61 (15.77 ± 0.93)	2.25 ± 1.86 (13.56 ± 1.68)
4-Chloro-2-cyclopentylphenol	13347-42-7	N/A	4.14 ± 4.09 (11.87 ± 11.11)	1.96 ± 0.55 (8.33 ± 3.38)	1.98 ± 1.48 (17.25 ± 9.91)	0.5 ± 0.66 (12.07 ± 1.77)
Minoxidil	38304-91-5	N/A	0.82 ± 0.38 (10.78 ± 12.23)	0.15 ± 0.25 (-1.96 ± 17.2)	0.34 ± 0.17 (15.45 ± 1.96)	0.06 ± 0.05 (29.32 ± 2.65)
Propylparaben	94-13-3	H315;H319;	27.94 ± 39.49 (24.35 ± 24.97)	0.14 ± 0.15 (12.79 ± 17.71)	0.01 ± 0 (8.69 ± 7.86)	0.05 ± 0.08 (20.93 ± 7.56)
tert-Butyl perbenzoate	614-45-9	H315;H317;				68.45 ± 79.73 (-10.67 ± 7.15)
Bis[2-(dimethylamino)ethyl]ether	3033-62-3	H311;H314;H318;		0.01 ± 0.01 (-9.39 ± 8.35)		0.46 ± 0.15 (8.27 ± 7.58)
Benzylacetone	2550-26-7	H315;H319;	7.1 ± 9.8 (-0.18 ± 8.23)
2,2-Dimethylpropane-1,3-diol	126-30-7	H315;H318;H319;	5.21 ± 7.68 (1.18 ± 14.58)		0.16 ± 0.17 (6.9 ± 7.6)	1.87 ± 1.08 (18.23 ± 6.53)
Benzyl butyl phthalate	85-68-7	N/A	2.3 ± 0.73 (4.91 ± 4.26)	28.5 ± 39.18 (9.25 ± 8.09)	6.46 ± 5.33 (18.12 ± 2.51)	2.27 ± 1.84 (23.42 ± 2.8)
Sodium nitrite	7632-00-0	H319;	0.6 ± 1.01 (11.05 ± 35.72)	0.19 ± 0.27 (-6.27 ± 11.74)	1.67 ± 2.86 (39.8 ± 12.36)
Ethanolamine	141-43-5	H312;H314;	49.24 ± 55.58 (9.13 ± 8.18)		0.01 ± 0 (-0.54 ± 17.3)	0.01 ± 0 (8.68 ± 7.52)
Citronellol	106-22-9	H315;H317;H319;	0.02 ± 0.02 (5.05 ± 16.18)		35.25 ± 0 (6.23 ± 5.45)	12.48 ± 17.64 (-3.8 ± 14.41)
Acetone	67-64-1	H319;				21.62 ± 30.57 (-3.48 ± 15.89)
2-Methyl-1,3-benzenediol	608-25-3	H315;H317;H318;H319;	12.04 ± 17.48 (-8.15 ± 17.63)	3.09 ± 3.72 (-16.5 ± 19.19)		60.7 ± 4.94 (-10.83 ± 9.93)
1-Hexanol	111-27-3	H312;H315;H319;		5.62 ± 7.92 (2.4 ± 11.1)	5.95 ± 1.34 (10.35 ± 1.08)	20.98 ± 20.6 (20.45 ± 6)
Sulfanilamide	63-74-1	H315;H319;	2.64 ± 3.12 (11.77 ± 13.4)		9.6 ± 4.12 (16.37 ± 7.09)	10.07 ± 8.01 (11.81 ± 0.89)
Ethyl methylphenylglycidate	77-83-8	H317;
2-Propenoic acid, 2-methyl-, 1,2-ethanediyl ester	97-90-5	H315;H317;H319;		44.28 ± 62.58 (5.95 ± 5.4)		0.01 ± 0.01 (-18.71 ± 2.84)
Oleic acid	112-80-1	H315;			29.59 ± 51.05 (-17.61 ± 10.38)
Butylparaben	94-26-8	H315;H319;	1.68 ± 1.42 (16.01 ± 10.63)	32.36 ± 33.24 (2.9 ± 15.55)	0.14 ± 0.05 (18.79 ± 16.3)
N,N-Dimethylformamide	68-12-2	H312;H312_H332;H319;		0.04 ± 0.05 (6.65 ± 5.78)
R-(-)-Carvone	6485-40-1	H317;	0.05 ± 0.07 (-2.48 ± 9.35)			14 ± 19.8 (-2.93 ± 19.12)
Urea	57-13-6	H315;				5.75 ± 1.6 (-8.98 ± 5.19)
1-Dodecanol	112-53-8	H315;	1.77 ± 2.48 (5.34 ± 4.95)			3.57 ± 3.22 (2.25 ± 16.16)
Methyl salicylate	119-36-8	H315;H319;	0.14 ± 0.22 (14.58 ± 8.77)	55.74 ± 78.81 (11.25 ± 11.07)	1.17 ± 1.03 (18.49 ± 2.66)	0.18 ± 0.24 (25.74 ± 12.96)
2-Butoxyethanol	111-76-2	H312;H315;H319;	0.56 ± 0.79 (5.21 ± 5.41)		0.85 ± 0.57 (5 ± 4.33)	28.18 ± 4.57 (-6.15 ± 5.32)
FD&C Blue No. 1	3844-45-9	H317;		15.12 ± 13.16 (-15.13 ± 4.93)	15.14 ± 4.84 (-6.85 ± 6.32)	45.32 ± 7.72 (-19.39 ± 2.52)
Ethylenediamine	107-15-3	H312;H314;H317;	8.39 ± 1.43 (-37.25 ± 16.26)	5.8 ± 4.11 (-22.29 ± 10.22)	1.58 ± 0.5 (-3.14 ± 2.72)
Diallyl phthalate	131-17-9	H317;	24.25 ± 12.4 (4.67 ± 13.33)		0.13 ± 0.04 (-9.09 ± 9.99)
Resorcinol	108-46-3	H315;H319;				30.81 ± 5 (-7.49 ± 6.7)
Diisopropanolamine	110-97-4	H314;H318;H319;				16.91 ± 20.37 (-11.16 ± 3.34)
C.I. Acid Orange 7	633-96-5	H315;H319;	3.01 ± 0.73 (-13.96 ± 15.13)	4.88 ± 1.84 (-34.48 ± 7.83)		45.95 ± 28.97 (-13.99 ± 3.55)
Uric acid	69-93-2	H315;H319;	6.77 ± 4.12 (-7.05 ± 6.11)	0.02 ± 0.02 (6.19 ± 5.62)		7.09 ± 10.59 (-12.38 ± 4.83)
Cinnamaldehyde (trans), neat	69-93-2	H312;H315;H317;H319;	9.66 ± 13.66 (-1.19 ± 14.44)	3.49 ± 2.76 (8.51 ± 7.86)		0.01 ± 0.01 (-17.53 ± 7.28)
Glyceryl monooleate	25496-72-4	N/A	6.9 ± 2.6 (-40.84 ± 19.35)	8.41 ± 5.03 (-25 ± 8.14)	10.16 ± 7.06 (-19.4 ± 0.77)	6.31 ± 2.74 (-15.15 ± 1.09)
Sodium dodecyl sulfate	25496-72-4	N/A	0.98 ± 0.7 (15.23 ± 8.59)	0.69 ± 0.96 (2.43 ± 10.84)
Benzenesulfonyl chloride	151-21-3	H312;H314;H317;H318;H319;			16.28 ± 1.32 (-19.56 ± 17.1)
3-(Dimethylamino)propylamine	109-55-7	H311;H312;H314;H317;H318;	3.32 ± 5.72 (1.41 ± 12.16)	6.43 ± 2.06 (-6.17 ± 6.53)
tetrachloroethylene	109-55-7	H315;H317;H320;	24.26 ± 34.3 (11.37 ± 11.84)	5.56 ± 3.01 (-5.91 ± 6.1)	0 ± 0 (18.57 ± 16.09)
Hexyl salicylate	6259-76-3	N/A	0.75 ± 0.28 (13.46 ± 6.79)	1.01 ± 1.13 (13.07 ± 6.49)	9.42 ± 4.07 (25.83 ± 16.31)	5.27 ± 7.66 (14.55 ± 5.76)
HC Blue 2	33229-34-4	H315;H317;H319;		28.63 ± 38.51 (-22.89 ± 25.04)	22.64 ± 18.62 (9.4 ± 2.63)	54.12 ± 50.04 (-10.82 ± 4.16)
4-Hydroxy-3-methoxybenzaldehyde	121-33-5	H317;H319;H320;	22.16 ± 29.81 (-9.79 ± 22.11)		21.96 ± 30.09 (15.9 ± 22.23)
Methyl coumarin	92-48-8	H319;	11.4 ± 15.33 (12.72 ± 13.29)	0.54 ± 0.65 (6.8 ± 6.58)	4.43 ± 6.26 (21.33 ± 3.09)	4.99 ± 7 (14.81 ± 16.59)
3-Ethoxy-4-hydroxybenzaldehyde	121-32-4	H315;H319;	0.95 ± 0.64 (-4.79 ± 5.88)
Carminic acid	1260-17-9	N/A	88.54 ± 0 (14.12 ± 13.98)	10.56 ± 18.06 (-1.42 ± 13.99)	44.28 ± 62.59 (19.19 ± 16.94)
Monoethanolamine	1260-17-9	H312;H314;	1.03 ± 1 (25.09 ± 9.76)	0.37 ± 0.52 (13.75 ± 5.64)	10.58 ± 14.48 (32.1 ± 14.02)	5.78 ± 0.47 (13.87 ± 12.92)
Acid green 50	3087-16-9	H315;H319;	1.21 ± 0.83 (-15.52 ± 8.39)	0.53 ± 0.35 (-14.99 ± 2.48)		13.03 ± 3.84 (-18.76 ± 5.42)
2-(2-Ethoxyethoxy)ethanol	111-90-0	H319;	11.13 ± 11.12 (7.78 ± 19.99)	0.01 ± 0 (9.25 ± 8.63)	10.25 ± 11 (15.52 ± 5.68)	0 ± 0 (-24.36 ± 5.38)
Anhydrosorbitol stearate	1338-41-6	N/A	9.35 ± 16.15 (17.83 ± 5.68)	1.34 ± 2.26 (10.31 ± 4.84)	6.14 ± 9.98 (14.89 ± 5.3)	12.49 ± 17.62 (8.69 ± 8.57)
3,7-Dimethyloctane-1,7-diol	107-74-4	H319;		24.78 ± 24.72 (-11 ± 3.61)
n-Butanol	107-74-4	H315;H319;		6.18 ± 8.5 (7.19 ± 6.23)	1.37 ± 0 (8.41 ± 7.5)
D&C Blue No. 9	130-20-1	N/A	4.24 ± 7.16 (19.78 ± 14.24)			22.24 ± 0 (9.07 ± 7.88)
2-Amino-4-nitrophenol	99-57-0	H312;H315;H319;	26.48 ± 11.54 (29.56 ± 3.36)		70.33 ± 0 (8.58 ± 7.61)
5,6,7,8-Tetrahydroquinoxaline	34413-35-9	H315;H319;	6.01 ± 1.45 (-20.92 ± 21.46)	6.92 ± 1.68 (-25.35 ± 4.54)
Erythrosin B	15905-32-5	H315;H319;	13.36 ± 23.08 (2.76 ± 24.36)	0.03 ± 0.04 (11.43 ± 9.91)	2.04 ± 2.6 (19.84 ± 8.07)	0.19 ± 0.32 (23.1 ± 11.8)
Polysorbate 80	9005-65-6	N/A	1.74 ± 2.44 (-12.24 ± 14.6)	1.58 ± 0.85 (16.2 ± 16.25)
Methylparaben	99-76-3	H315;H319;	2 ± 1.51 (27.3 ± 7.91)	4.26 ± 7.14 (17.85 ± 7.39)	7.03 ± 9.9 (16.59 ± 4.03)	0.13 ± 0.04 (6.59 ± 5.77)
Boric acid	10043-35-3	H315;H319;	0.02 ± 0.01 (6.68 ± 6.31)			0.01 ± 0.01 (9.61 ± 3.61)
Caffeine	58-08-2	H318;H319;	0.23 ± 0.23 (10.27 ± 1.12)	0.7 ± 0.99 (6.68 ± 5.94)	0.22 ± 0.11 (18.12 ± 0.99)	0.1 ± 0.02 (16.52 ± 3.1)
Ethyl benzoylacetate	94-02-0	H315;H319;	2.13 ± 1.87 (-32.44 ± 25.48)	1.42 ± 1.52 (-22.6 ± 25.99)
1,9-decadiene	94-02-0	H315;H319;	1.5 ± 1.5 (25.81 ± 2.56)	0.6 ± 0.97 (11.93 ± 2.39)	1.35 ± 1.82 (27.7 ± 3.16)	6.25 ± 7.99 (26.68 ± 5.12)
Glycerol	7585-39-9	H315;H317;H318;H319;	3.71 ± 3.84 (12.84 ± 3.95)	2.89 ± 1.89 (5.53 ± 10.66)	0.1 ± 0.1 (11.04 ± 1.64)	0.02 ± 0.01 (12.75 ± 1.34)
Monobromoacetic Acid	56-81-5	H311;H314;H317;	0.01 ± 0 (5.84 ± 5.4)	10.87 ± 11.94 (-7.52 ± 7.64)		12.16 ± 17.19 (-1.14 ± 10.75)
Poly(2-hydroxypropyl methacrylate)	79-08-3	H315;H317;H319;	0.94 ± 1.11 (-25.44 ± 32.02)	0.96 ± 0.58 (-14.6 ± 13.85)		0.74 ± 0.18 (-3.83 ± 3.47)
alpha-Methyl cinnamaldehyde	25703-79-1	H317;
Trimellitic anhydride	552-30-7	H317;	4.43 ± 6.26 (8.44 ± 7.32)			7.92 ± 11.07 (-6.98 ± 7.82)
Betaine	107-43-7	H319;		0.21 ± 0.27 (12.55 ± 14.79)	8.44 ± 7.45 (19.85 ± 7.6)	5.75 ± 6.04 (26.34 ± 11.77)
(3Z)-Hex-3-en-1-yl salicylate	65405-77-8	H317;				0.01 ± 0 (4.67 ± 4.16)
Benzophenone	119-61-9	H315;H319;	0.12 ± 0.01 (8.88 ± 9.7)	0.58 ± 0.76 (-0.44 ± 8.99)	0.15 ± 0.03 (17.38 ± 2.45)	0.12 ± 0.02 (16.8 ± 0.17)
4-Hydroxybenzoic acid	99-96-7	H319;	0.94 ± 1.17 (-19.94 ± 26.38)	1.55 ± 0.61 (-20.47 ± 26.86)		17.67 ± 0 (-5.22 ± 4.61)
Methyleugenol	93-15-2	H317;H320;		0.22 ± 0.31 (-6.73 ± 6.04)
Sulisobenzone	4065-45-6	H315;H317;H319;	17.67 ± 0 (11.41 ± 9.89)	16.96 ± 28.43 (25.55 ± 3.9)	10.38 ± 1.32 (11.24 ± 2.82)	24.05 ± 1.57 (14.73 ± 1.52)
Geranyl acetate	105-87-3	H315;H317;	0.08 ± 0.1 (14.62 ± 7.27)	1.25 ± 1.76 (7.65 ± 8.39)	0.51 ± 0.65 (19.86 ± 11.11)	0.64 ± 0.97 (29.95 ± 12.57)
Sodium hydrogen sulfate	7681-38-1	H318;		0.04 ± 0.03 (-2.22 ± 11.21)		3.44 ± 4.82 (-0.17 ± 6.75)
1-Octanol	111-87-5	H315;H319;		1.13 ± 1.15 (-9.28 ± 3.75)
Salicylic acid	69-72-7	H312;H315;H317;H318;H319;		2.72 ± 3.85 (-1.67 ± 12.58)		3.6 ± 3.55 (-5.17 ± 4.8)
Dehydroacetic acid	520-45-6	N/A	0 ± 0 (14.42 ± 15.2)	0.03 ± 0.03 (9.08 ± 8.98)	10.68 ± 2.58 (6.76 ± 5.85)	1.42 ± 2.2 (20.04 ± 11.02)
Chloramine T hydrate (1:x)	149358-73-6	H314;	65.65 ± 58.87 (3.56 ± 18.69)
Streptomycin sulfate (2:3)	3810-74-0	H317;		7.68 ± 10.84 (1.02 ± 16)		6.11 ± 8.59 (-10.33 ± 10.02)
Citric acid	77-92-9	H318;	6.79 ± 11.29 (42.22 ± 26.15)		24.9 ± 35.2 (20.11 ± 18.68)	13.79 ± 16.05 (26.55 ± 9.94)
1-Propanol	71-23-8	H318;	5.31 ± 5.01 (7.91 ± 6.95)	4.71 ± 5.87 (7.96 ± 7.09)	0.1 ± 0.14 (7.19 ± 19.62)	30.26 ± 30.12 (12.37 ± 1.45)
Methylpolysilicone	9004-73-3	N/A	8.56 ± 12.79 (18.38 ± 7.01)	0.01 ± 0.01 (6.77 ± 5.87)		13.65 ± 0.92 (19.46 ± 1.8)
2-Methyl-2,4-pentanediol	107-41-5	H315;H319;	0.02 ± 0.01 (19.59 ± 10.31)	0.01 ± 0.01 (9.37 ± 8.56)	0.14 ± 0.11 (12.26 ± 1.47)	0.04 ± 0.03 (17.32 ± 0.67)
2-Methyl-3-[4-(propan-2-yl)phenyl]propanal	103-95-7	H315;H317;	0.66 ± 1.14 (23.35 ± 2.79)	1.33 ± 2.28 (13.86 ± 6.19)	0.38 ± 0.33 (19.7 ± 13.19)	0.4 ± 0.34 (17.39 ± 4.25)
Hydroxylamine sulfate	10039-54-0	H312;H315;H317;H319;	1.57 ± 0.84 (20.84 ± 4.25)	1.11 ± 0.6 (12.73 ± 11.56)	0 ± 0 (39.66 ± 9.11)
2-Ethylhexyl acrylate	103-11-7	H315;H317;		0.34 ± 0.4 (5.95 ± 5.16)
2',4',5',7'-Tetrabromofluorescein	15086-94-9	N/A	28.37 ± 40.08 (-0.54 ± 15.22)	15.28 ± 21.72 (5.33 ± 13.76)
Tetradecanoic acid	544-63-8	H315;H319;	23.24 ± 2.96 (29.77 ± 9.36)			4 ± 4.49 (-2.91 ± 10.06)
Sucrose	57-50-1	H311;H315;		0.01 ± 0.02 (7.62 ± 7.66)	11.22 ± 17.51 (15.98 ± 5.75)	56.45 ± 31.8 (23.23 ± 0.86)
2-Phenylethanol	60-12-8	H319;	0 ± 0 (14.74 ± 1.91)			0 ± 0 (8.3 ± 7.21)
Diethyl maleate	141-05-9	H319;	0.29 ± 0.39 (0.39 ± 11.6)		31.41 ± 0 (8.57 ± 7.42)	16.02 ± 21.77 (10.46 ± 11.78)
1-Decanol	112-30-1	H315;H319;	21.96 ± 13.37 (-0.87 ± 14.09)
Sodium xylenesulfonate	1300-72-7	H315;H319;	10.56 ± 8.03 (13.11 ± 2.08)	1.98 ± 2.79 (6.36 ± 5.81)	4.44 ± 3.85 (12.27 ± 3.04)	9.46 ± 2.79 (16.11 ± 1.42)
1,2-Octanediol	1117-86-8	H318;H319;	0.13 ± 0.04 (-3.14 ± 2.72)	6.32 ± 8.74 (-0.39 ± 8.06)		27.94 ± 39.49 (-2.11 ± 11.97)
alpha-Ionone	127-41-3	N/A	3.33 ± 0.27 (17.11 ± 15.19)	1.25 ± 1.76 (11.86 ± 12.75)	9.25 ± 9.96 (25.78 ± 11.01)	4.1 ± 6.11 (30.67 ± 9.9)
Ethylparaben	120-47-8	H315;H317;H319;		9.91 ± 14.01 (6.25 ± 6.91)		0.45 ± 0.62 (-1.25 ± 11.71)
5-Heptyldihydro-2(3H)-furanone	104-67-6	H315;H319;			1.18 ± 0.1 (8.49 ± 7.46)
1,4-Dioxacycloheptadecane-5,17-dione	105-95-3	N/A			0.24 ± 0.02 (6.13 ± 5.44)	0.19 ± 0.02 (6.32 ± 5.47)
C.I. Acid Yellow 17, disodium salt	6359-98-4	H319;	3.4 ± 5.66 (20.43 ± 4.91)	0.05 ± 0.06 (-6.2 ± 6.16)	1.51 ± 1.01 (7.81 ± 8.96)	0 ± 0 (16.29 ± 3.55)
Octadecanoic acid	57-11-4	H315;	30.69 ± 50.13 (1.95 ± 27.2)		3.55 ± 0.58 (10.09 ± 8.74)
3-Propylidene phthalide	17369-59-4	H317;			10.27 ± 0.84 (-6.02 ± 5.23)	16.75 ± 27.53 (-3.83 ± 9.29)
Note: Blank cell indicated the chemical is inactive. Chemicals in bold font are OECD reference compounds																							F	FALSE	FALSE
